1 TITLE: Global transcriptional regulation of innate immunity in *C. elegans*

2

3 SHORT TITLE: p38 MAPK – ATF regulated immunity in *C. elegans*

4

5 AUTHORS: Marissa Fletcher<sup>1</sup>, Erik J. Tillman<sup>1</sup>, Vincent L. Butty<sup>2</sup>, Stuart S. Levine<sup>2</sup>, and

6 Dennis H. Kim<sup>1\*</sup>

7

8

9

10 AUTHOR AFFILIATIONS: <sup>1</sup>Department of Biology, Massachusetts Institute of

11 Technology, Cambridge, MA 02139, USA

12 <sup>2</sup>BioMicro Center, Massachusetts Institute of Technology, Cambridge, MA 02139, USA

13

14 \*Corresponding author

15 E-mail: [dhkim@mit.edu](mailto:dhkim@mit.edu)

16

17

18 KEYWORDS: *C. elegans*, p38 MAPK signaling, innate immunity, PMK-1, ATF-7

## 19 **Abstract**

20 The nematode *Caenorhabditis elegans* has emerged as a genetically tractable animal host  
21 in which to study evolutionarily conserved mechanisms of innate immune signaling. We  
22 previously showed that the PMK-1 p38 mitogen-activated protein kinase (MAPK)  
23 pathway regulates innate immunity of *C. elegans* through phosphorylation of the  
24 CREB/ATF bZIP transcription factor, ATF-7. Here, we have undertaken a genomic  
25 analysis of the transcriptional response of *C. elegans* to infection by *Pseudomonas*  
26 *aeruginosa*, combining genome-wide expression analysis by RNA-seq with ATF-7  
27 chromatin immunoprecipitation followed by sequencing (ChIP-Seq). We observe that  
28 PMK-1-ATF-7 activity regulates a majority of all genes induced by pathogen infection,  
29 and observe ATF-7 occupancy in regulatory regions of pathogen-induced genes in a  
30 PMK-1-dependent manner. Moreover, functional analysis of a subset of these ATF-7-  
31 regulated pathogen-induced target genes supports a direct role for this transcriptional  
32 response in host defense. The genome-wide regulation through PMK-1– ATF-7 signaling  
33 reveals global control over the innate immune response to infection through a single  
34 transcriptional regulator in a simple animal host.

## 35 **Author Summary**

36 Innate immunity is the first line of defense against invading microbes across metazoans.  
37 *Caenorhabditis elegans* lacks adaptive immunity and is therefore particularly dependent  
38 on mounting an innate immune response against pathogens. A major component of this  
39 response is the conserved PMK-1/p38 MAPK signaling cascade, the activation of which  
40 results in phosphorylation of the bZIP transcription factor ATF-7. Signaling via PMK-1  
41 and ATF-7 causes broad transcriptional changes including the induction of many genes  
42 that are predicted to have antimicrobial activity including C-type lectins and lysozymes.  
43 In this study, we show that ATF-7 directly regulates the majority of innate immune  
44 response genes upon pathogen infection of *C. elegans*, and demonstrate that many ATF-7  
45 targets function to promote pathogen resistance.

## 46 **Introduction**

47           Convergent genetic studies of host defense of *Drosophila melanogaster* and  
48 mammalian innate immune signaling revealed a commonality in signaling pathways of  
49 innate immunity that has helped motivate the study of pathogen resistance mechanisms in  
50 genetically tractable host organisms such as *Caenorhabditis elegans* [1]. The simple *C.*  
51 *elegans* host has enabled the genetic dissection of integrative stress physiology  
52 orchestrating host defense of *C. elegans*[2-5]. Genetic analysis of resistance of *C. elegans*  
53 to infection by pathogenic *Pseudomonas aeruginosa* has defined an essential role for a  
54 conserved p38 mitogen-activated protein kinase pathway that acts on a CREB/ATF  
55 family bZIP transcription factor, ATF-7, in immune responses [6,7]. A complementary  
56 approach to characterizing the host response has been organismal transcriptome-wide  
57 characterization of genes induced upon infection by a number of different bacterial  
58 pathogens [8-15]. Putative effector genes encoding lysozymes and C-type lectin domain  
59 (CTLD)-containing proteins have been identified that have also served as useful markers  
60 of immune induction. Here, we report the genome-level characterization of the *C. elegans*  
61 response to *P. aeruginosa* that is mediated by ATF-7 activity downstream of PMK-1  
62 activation, combining RNA-seq analysis of pathogen-induced gene expression with  
63 ChIP-seq analysis of ATF-7 binding, which suggests global regulation of the immune  
64 response of *C. elegans* through a single MAPK- transcription factor pathway.

65

## 66 **Results and Discussion**

67           We performed RNA-seq on wild-type (N2), *pmk-1* mutant, or *atf-7* mutant  
68 animals exposed to *E. coli* OP50 or *P. aeruginosa* PA14 to identify genes that are

69 differentially regulated upon infection that also require PMK-1 or ATF-7 for induction  
70 (Figure 1A). We found that in wild-type animals, 890 genes were two-fold upregulated  
71 (adjusted p-value <0.05), and 803 genes were two-fold downregulated upon *P.*  
72 *aeruginosa* exposure, compared to animals exposed in parallel to *E. coli* (Figure 1B;  
73 Table S1). Many of these upregulated genes have been previously implicated in the *C.*  
74 *elegans* immune response and including genes encoding C-type lectin domain (CTLD)-  
75 containing genes and lysozymes, corroborating prior microarray-based gene expression  
76 studies (Figure 1C) [8-10,12-14]. In contrast, gene ontology analysis of genes that are  
77 decreased in expression upon *P. aeruginosa* exposure shows enrichment for genes  
78 associated with homeostasis with significant ontology terms consistent with growth,  
79 development and reproduction (Figure S1A). Of note, many of the genes upregulated in  
80 response to *P. aeruginosa* exposure exhibit relatively low expression when animals are  
81 propagated on *E. coli*, whereas genes that are decreased in expression upon *P. aeruginosa*  
82 exposure are expressed at a higher basal level during normal growth conditions on *E. coli*  
83 (Figure 1D, S1B). In parallel, we analyzed *P. aeruginosa*-mediated gene expression  
84 changes in *pmk-1* and *atf-7* mutants to identify the proportion of genes induced by *P.*  
85 *aeruginosa* exposure that required PMK-1 and/or ATF-7 for induction (Figure S2). We  
86 observed that 70% of genes significantly induced two-fold or greater by *P. aeruginosa*  
87 exposure were no longer fully induced upon loss of *pmk-1*, and that 53% of upregulated  
88 genes were no longer fully induced upon loss of *atf-7* (Figure 1E, Table S1). We also  
89 found that 41% of genes reduced two-fold or more by *P. aeruginosa* required PMK-1,  
90 and 50% required ATF-7 for reduction of expression (Figure S2B, Table S1). These data

91 implicate a high degree of involvement of PMK-1-ATF-7 signaling in the majority of  
92 changes in gene expression induced in response to infection by *P. aeruginosa*.

93 To evaluate the role of ATF-7 in the direct regulation of genes induced by *P.*  
94 *aeruginosa* infection, we performed chromatin immunoprecipitation followed by  
95 sequencing (ChIP-seq) of animals carrying a GFP-tag fused to the C-terminal end of the  
96 endogenous *atf-7* locus. Using a GFP polyclonal antibody for immunoprecipitation, we  
97 generated ChIP binding profiles for animals in either the wild-type background (*atf-*  
98 *7(qd328[atf-7::2xTY1::GFP])*) or the *pmk-1* mutant background (*pmk-1(km25);atf-*  
99 *7(qd328[atf-7::2xTY1::GFP])*) after a four hour exposure to either *E. coli* OP50 or *P.*  
100 *aeruginosa* PA14, for a total of four conditions, similar to the treatment described in  
101 Figure 1A. In all conditions analyzed, ATF-7 exhibited abundant association throughout  
102 the genome, with around 9,000 total peaks identified as enriched by MACS2,  
103 corresponding to 23% of genes and 25% of transcription start sites (TSSs) (Table S2).

104 Analysis of the ATF-7 binding profile across all genes associated with enriched  
105 TSSs, as well as the subset altered in expression by *P. aeruginosa* in wild-type animals  
106 according to our RNA-seq data, revealed that ATF-7 is preferentially located at the  
107 promoter regions of genes that are increased in expression by *P. aeruginosa*, and that this  
108 enrichment for ATF-7 is lessened by *pmk-1* loss (Figure 2B, Figure S3A). MEME  
109 analysis of the most enriched loci identified significant enrichment for the motif  
110 GACgTCA, which corresponds to the Jun D bZIP motif expected for ATF-7 (Figure 2A).  
111 This motif is present in as many as 80% of the most highly enriched regions of the  
112 genome and its abundance is positively correlated with enrichment levels.

113 To identify the most likely immediate downstream targets of ATF-7, we set a  
114 peak threshold based on the fraction of peaks containing the bZIP motif after ranking  
115 ATF-7 peaks by enrichment (Figure S3B). This resulted in ~1500-4000 highly enriched  
116 locations per experiment. Overlap of the of the retained ATF-7 binding profile of *P.*  
117 *aeruginosa*-induced genes compared to the RNA-seq data from *P. aeruginosa* induction  
118 was measured using a Gene Set Enrichment Analysis (GSEA), which showed that ChIP  
119 peaks were enriched for association with transcripts that are positively changed upon  
120 pathogen exposure in both *E. coli* and *P. aeruginosa* ChIP conditions (Figure 2C, Figure  
121 S3C). This association remains in the *pmk-1* mutant, although at weaker significance  
122 level (Figure 2D, Figure S3D). Moreover, we also evaluated ATF-7 binding at individual  
123 genomic loci induced by *P. aeruginosa* infection that were dependent on ATF-7 for full  
124 upregulation. Examinations of distinct genetic loci further support the conclusions drawn  
125 from the metagene analyses described above (Figure 3). These observations suggest a  
126 direct transcriptional regulatory role for ATF-7 in the induction of broad transcriptional  
127 changes upon immune challenge involving activation of p38/PMK-1 MAPK signaling in  
128 response to *P. aeruginosa* infection.

129 For functional validation of putative ATF-7-regulated immune response target  
130 genes, we focused on transcripts that were upregulated at least two-fold by *P. aeruginosa*  
131 exposure in an ATF-7-dependent manner and that were also bound by ATF-7 in any of  
132 our four ChIP-seq conditions. Included among these putative ATF-7 targets were genes  
133 encoding antimicrobial effector molecules, such as CTLD-containing proteins and  
134 lysozymes (Table S3). We determined whether RNAi-mediated knockdown of these  
135 genes resulted in enhanced susceptibility to killing by *P. aeruginosa* and observed that

136 RNAi of 13 of 43 genes conferred enhanced sensitivity to killing by *P. aeruginosa*,  
137 without affecting survival on non-pathogenic *E. coli* (Table S3, Figure S4).

138 Our data suggest that ATF-7 is a direct regulator of immune effector genes that is  
139 regulated by PMK-1 p38 MAPK. We previously proposed a model in which PMK-1  
140 phosphorylates ATF-7 in response to pathogen infection, switching the activity of ATF-7  
141 from that of a transcriptional repressor to that of an activator, allowing the induction of  
142 immune response genes [7]. Our data here are consistent with this model, showing a  
143 strong dependence of pathogen-induced gene induction on PMK-1 and ATF-7, and a high  
144 degree of occupancy of regulatory regions of pathogen-induced genes by ATF-7 under  
145 basal and pathogen-induced conditions, with ATF-7 occupancy of pathogen-induced  
146 genes being strongly dependent on PMK-1. Moreover, our data reveal that PMK-1-ATF-  
147 7 signaling regulates over half of all pathogen-induced genes at the genome-wide level.

148 PMK-1 signaling has also been implicated in a number of non-infection contexts in  
149 *C. elegans* [2,16,17]. Interestingly, we observed that ATF-7 binds quite strongly to  
150 several key regulators of stress response pathways. We found that ATF-7 exhibits  
151 binding affinity to regulators of autophagy (*lgg-1*), the Unfolded Protein Response (*xbp-*  
152 *1*), and the oxidative stress response (*skn-1*), as well as several immunity regulators (*hlh-*  
153 *30*, *zip-2*, and interestingly, *atf-7*) (Figure 4). These observations suggest that initiation of  
154 other stress responses may be integrated with the immune response. For example, we  
155 have previously shown that immune response activation in developing larval is lethal  
156 without compensatory XBP-1 activity, establishing an essential role for XBP-1 during  
157 activation of innate immunity during infection of *C. elegans* [2]. We speculate that ATF-  
158 7 may function to activate anticipatory stress responses that can be activated in concert



159 with innate immunity to promote host survival during microbial infection in a context-  
160 dependent manner. Our genomic and genetic findings in the simple, genetically tractable  
161 *C. elegans* host reveal a striking degree of global regulation of the organismal response to  
162 pathogenic bacteria through a single p38 MAPK-regulated transcriptional regulator. Our  
163 data support the idea that host defense, on a genome-wide and organism-wide level, is  
164 under the control of a limited number of stress-activated signaling pathways that regulate  
165 global regulators of gene transcription.

## 166 **Materials and Methods**

### 167 ***C. elegans* Strains**

168 Strains used: N2, ZD386 (*atf-7(qd22 qd130)*), KU25 (*pmk-1(km25)*), ZD1807  
169 (*atf-7(qd328[atf-7::2xTY1::GFP])*), ZD1976 (*atf-7(qd328[atf-7::2xTY1::GFP]);pmk-*  
170 *1(km25)*). *C. elegans* were maintained at 16°C on *E. coli* OP50 as described [18]. The *atf-*  
171 *7(qd328)* allele was generated by the CRISPR-Cas9 system as described [19,20] and  
172 verified by Sanger sequencing. GFP expression in ZD1807 (*atf-7(qd328)*) was verified by  
173 immunoblotting, and pull-down was assessed by IP-IB. The *atf-7(qd238)* allele was  
174 confirmed to function as wild-type, as assayed by susceptibility to *P. aeruginosa* strain  
175 PA14 in a slow kill assay, and then crossed into the *pmk-1(km25)* mutant background.

176

### 177 **Preparation of Animals for Sequencing Experiments**

178 Slow Kill Assay (SKA) plates were prepared as previously described [21]. *P.*  
179 *aeruginosa* strain PA14 or *E. coli* OP50 was grown overnight in Luria Broth (LB),  
180 seeded onto SKA media and then grown overnight at 37°C, followed by an additional day  
181 at room temperature as previously described [22]. Large populations of animals were  
182 synchronized by egg-preparation of gravid adult worms in bleach, followed by L1 arrest  
183 overnight in M9 buffer. L1 animals were dropped onto concentrated OP50 lawns seeded  
184 onto Nematode Growth Media (NGM) and raised to the L4 larval stage at 20°C (about 40  
185 h). Upon reaching L4, worms were washed off growth plates with M9 and placed on  
186 SKA plates prepared as described above, seeded with either PA14 or OP50 and incubated  
187 at 25°C for four hours. At this time, worms were harvested by washing for downstream  
188 applications.

189

## 190 **Chromatin Immunoprecipitation Followed by Sequencing**

191       After three washes in M9 buffer, animal pellets were resuspended in an equal  
192 volume of PBS + complete ULTRA protease inhibitor tablets (Roche), flash frozen in  
193 liquid nitrogen, and stored at -80°C until chromatin immunoprecipitation (ChIP). ChIP  
194 was performed as described [23,24] using Ab290, a ChIP-grade polyclonal GFP antibody  
195 (Abcam). Libraries were prepared using the SPRIworks Fragment Library System  
196 (Beckman Coulter) and single-end sequenced on an Illumina HiSeq2000 sequencer.  
197 Three biological replicates of at least 15,000 animals were prepared and sequenced for  
198 each condition, with the exception of only two replicates for *atf-7(qd328)* on PA14, as  
199 one of the samples failed to pass quality control.

200       ChIP-seq reads were aligned against the *C. elegans* WBPS9 assembly using bwa  
201 v. 0.7.12-r1039 [25] and the resulting bam files were sorted and indexed using samtools  
202 v. 1.3 [26]. Sorted bam files were pooled by strain and microbial treatment, and peaks  
203 were called using MACS2 (v. 2.1.1.20160309), as follows: callpeak on specific strain  
204 bam file (“-t” flag) against the N2\_PA14 control sample bam file (“-c” flag) callpeak -c  
205 N2\_PA14\_control.sorted.bam -g ce --keep-dup all --call-summits --extsize 150 -p 1e-3 --  
206 nomodel -B. Peak locations were intersected with regions +/-0.5kb around annotated TSS  
207 based on the WBPS9/WS258 annotation using bedtools intersect (v2.26.0) [27], and in  
208 cases of multiple peaks associated with a given TSS, peaks with maximal enrichment  
209 over N2 control were retained. For the purpose of motif identification, peaks were ranked  
210 by fold-enrichment over N2 control in descending order and the top 400 peaks were  
211 retained, regions +/- 200 bps around the summit were retrieved and sequences were

212 obtained with bedtools getfasta. MEME-ChIP v. 4.12.0 [28] was used to call motifs using  
213 the following parameters: meme-chip -oc . -time 300 -order 1 -db  
214 db/JASPAR/JASPAR2018\_CORE\_nematodes\_non-redundant.meme -meme-mod anr -  
215 meme-minw 5 -meme-maxw 30 -meme-nmotifs 8 -dreme-e 0.05 -centrimo-local -  
216 centrimo-score 5.0 -centrimo-ethresh 10.0 . Presence of the top motifs under each peak  
217 called by macs2 was assessed using Mast v.5.0.1 [29] on the same +/- 200bp region  
218 around the summit of each peak. The number of peaks with one or more occurrences of  
219 the motif was tallied using a 200-peak window, and plotted across all peaks ranked either  
220 by log-fold enrichment over N2 or -log-transformed p-values. Inflection points in the  
221 motif density function were used to narrow down the number of peaks retained for  
222 downstream analyses.

223

## 224 **RNA Sequencing**

225 After three washes in M9 buffer, TRIzol™ Reagent (Invitrogen) was added to  
226 worm pellets and flash frozen in liquid nitrogen. Following an additional round of freeze-  
227 thaw, RNA was isolated using the Direct-zol™ RNA MiniPrep kit (Zymo Research).  
228 Libraries were prepared using the Kapa mRNA Hyperprep kit and paired end reads were  
229 sequenced on the Illumina NextSeq500 sequencer. Three biological replicates of at least  
230 1,000 animals were prepared and sequenced for each condition, with the exception of  
231 only two replicates for *atf-7(qd22 qd130)* on PA14, as one of the samples failed to pass  
232 quality control.

233 Reads were aligned against the *C. elegans* WBPS9 assembly/ WS258 annotation  
234 using STAR v. 2.5.3a [30] with the following flags: -runThreadN 16 --runMode

235 alignReads --outFilterType BySJout --outFilterMultimapNmax 20 --alignSJoverhangMin  
236 8 --alignSJDBoverhangMin 1 --outFilterMismatchNmax 999 --alignIntronMin 10 --  
237 alignIntronMax 1000000 --alignMatesGapMax 1000000 --outSAMtype BAM  
238 SortedByCoordinate --quantMode TranscriptomeSAM . with --genomeDir pointing to a  
239 low-memory footprint, 75nt-junction WBPS9/WS258 STAR suffix array. Gene  
240 expression was quantitated using RSEM v. 1.3.0 [31] with the following flags for all  
241 libraries: rsem-calculate-expression --calc-pme --alignments -p 8 against an annotation  
242 matching the STAR SA reference. Posterior mean estimates (pme) of counts and  
243 estimated “transcript-TPMs” were retrieved for genes and isoforms. Subsequently, counts  
244 of isoforms sharing a transcription start site (TSS) were summed, and differential-  
245 expression analysis was carried out using DESeq2 [32] in the R v3.4.0 statistical  
246 environment, building pairwise models of conditions to be compared (microbial  
247 exposures within each genotype). Sequencing library size factors were estimated for  
248 each library to account for differences in sequencing depth and complexity among  
249 libraries, as well as gene-specific count dispersion parameters (reflecting the relationship  
250 between the variance in a given gene’s counts and that gene’s mean expression across  
251 samples).

252 Differences in gene expression between conditions (expressed as log<sub>2</sub>-  
253 transformed fold-changes in expression levels) were estimated under a general linear  
254 model (GLM) framework fitted on the read counts. In this model, read counts of each  
255 gene in each sample were modeled under a negative binomial distribution, based on the  
256 fitted mean of the counts and aforementioned dispersion parameters. Differential  
257 expression significance was assessed using a Wald test on the fitted count data (all these

258 steps were performed using the DESeq() function in DESeq2) [32]. P-values were  
259 adjusted for multiple-comparison testing using the Benjamini-Hochberg procedure [33].

260

#### 261 **Data availability**

262 Raw data presented in this manuscript have been deposited in NCBI's Gene  
263 Expression Omnibus [34] and are accessible through GEO SuperSeries accession number  
264 GSE119294, which contains SubSeries GSE119292 (RNA-seq data, including count  
265 files) and SubSeries GSE119293 (ChIP-seq data, including wig files and peak calls).

266

#### 267 **Evaluation of ATF-7 binding and modulation of gene expression**

268 Metagene analyses of gene expression and ATF-7 binding enrichment were  
269 generated by ngs.plot as described [35], using ChIP .bam files from each condition  
270 normalized to N2 control as input. Genes considered two-fold upregulated or  
271 downregulated are listed in the "N2\_up" and "N2\_down" tabs of Table S1, respectively.

272 Correlations between ATF-7 binding and regulation of gene expression were  
273 interrogated using the gene set enrichment analysis (GSEA) framework [36]. Briefly, all  
274 transcription start sites (TSSs) associated with a protein-coding transcript were ranked  
275 based on differential expression results from DESeq2 (log2 fold-changes), which is a  
276 measure of the correlation between their expression and the host response to infectious  
277 agents. Biases in expression of ATF-7-bound TSSs were assessed using a walk down the  
278 list tallying a running-sum statistic, which increases each time a TSS is part of the list and  
279 decreases otherwise. The maximum of this metrics (i.e. where the distribution is furthest  
280 away from the background) is called the enrichment score (ES). Significance is estimated

281 using random permutations of the TSSs to generate p-values gauging how often the  
282 observed ES can be seen in randomized gene sets, for each direction of the expression  
283 biases independently. Multiple-testing correction is addressed using a false-discovery rate  
284 calculation on permuted datasets.

285

### 286 **Gene Ontology analysis**

287 Genes with adjusted p-values  $<0.05$  were considered for Gene Ontology  
288 enrichment analysis using the DAVID online webtool, considering as a background the  
289 union of all genes with a non-zero baseMean value across any of the DE comparison,  
290 based on unique WormBase IDs.

291

### 292 **Killing Assays and Bacterial Strains**

293 PA14 plates were prepared as described as above. N2 animals were grown on  
294 NGM, supplemented with 25 ug/mL carbenicillin and 2mM isopropyl b-D-1  
295 thiogalactopyranoside (IPTG), that was seeded with either the *E. coli* HT115 expressing  
296 plasmids targeting the gene of interest or the empty L4440 vector backbone for two  
297 generations prior to each experiment. Animal populations were synchronized by egg lay.  
298 At the L4 larval stage, approximately 30 worms were transferred to prepared SKA plates  
299 and incubated at 25°C. Animals were scored for killing twice daily until the majority of  
300 animals had died. Within each experiment, three plates were prepared and scored per  
301 RNAi treatment. All clones were obtained from the Ahringer [37] or Vidal [38] RNAi  
302 libraries and were verified by sequencing. For a list of all RNAi clones used, see Table  
303 S4.

304 **Author Contributions**

305 M.F. and E.J.T. performed all experiments. V.B. and S.S.L. performed bioinformatics  
306 analysis of RNA-seq and ChIP-seq datasets. M.F. and D.H.K analyzed data, interpreted  
307 results, and wrote the paper with input from E.J.T.

308

309 **Acknowledgements**

310 We thank H.R. Horvitz and the *Caenorhabditis* Genetics Center for providing strains and  
311 reagents. This work was funded by NIH grants R01GM084477 (to DHK) and  
312 T32GM007287 (to MF and EJT).



313 **Figure 1: Exposure to *P. aeruginosa* prompts gene expression changes.**

314 **(A)** Schematic of experimental design. Yellow bacterial lawn indicates *E. coli* OP50,  
315 green bacterial lawn indicates *P. aeruginosa* PA14. PMK-1 and ATF-7 activation states  
316 are indicated below each condition. **(B)** Volcano plot of transcripts corresponding to  
317 differentially expressed protein-coding genes by exposure to *P. aeruginosa* PA14 versus  
318 *E. coli* OP50 in N2 animals. Orange and blue colored dots denote the top 100 outliers that  
319 are increased or decreased, respectively, and are annotated with their gene names. **(C)**  
320 Top GO terms and InterPRO classifications of transcripts that are significantly  
321 upregulated (adjusted p-value < 0.05) in N2 animals exposed to PA14 versus OP50. **(D)**  
322 Average expression (RPM) across the gene body of genes that are two-fold upregulated  
323 by exposure to pathogenic PA14. **(E)** Venn diagram of induced genes that are dependent  
324 upon *pmk-1* or *atf-7* for complete upregulation.

325 **Figure 2: ATF-7 associates with genes that are differentially expressed upon**  
326 **exposure to pathogenic *P. aeruginosa*.**  
327 **(A)** Motif analysis of ATF-7::GFP ChIP peaks. The top 400 peaks (indicated by red  
328 shading) were considered for motif analysis. **(B)** Metagene analysis of ATF-7::GFP  
329 binding profile in WT or *pmk-1(km25)* mutant animals exposed to PA14 across genes that  
330 are two-fold upregulated (by RNA-seq) upon exposure to PA14. Shading represents  
331 standard error among replicates. **(C,D)** Gene Set Enrichment Analysis (GSEA) of  
332 transcripts detected by RNA-seq (ranked from most upregulated to most downregulated  
333 upon PA14 exposure in N2 animals) for association with ATF-7::GFP peaks in WT (C)  
334 or *pmk-1(km25)* mutant (D) animals exposed to PA14.

335 **Figure 3: ATF-7 binding at PA14-induced genes.**

336 Examples of ATF-7::GFP read pileup at individual loci in all four ChIP conditions.

337 Expression in transcripts per kilobase million (TPM) in all RNA-seq conditions are

338 displayed to the right of each locus. For genes with multiple isoforms, the most highly

339 abundant transcript is displayed.

340 **Figure 4: ATF-7 binds to regulatory regions of key regulators of stress physiology.**

341 Examples of ATF-7::GFP read pileups stress response (A-C) and immune (D-F)

342 regulators.

343

344 **Supplemental Figure 1: Expression of genes decreased by PA14 exposure.**

345 **(A)** Top GO terms and InterPRO classifications of transcripts that are significantly  
346 downregulated (adjusted p-value < 0.05) in N2 animals exposed to PA14 versus OP50.  
347 **(B)** Average expression (RPM) across the gene body of genes that are two-fold  
348 downregulated by exposure to pathogenic PA14. **(C)** Venn diagram of decreased genes  
349 that are dependent upon *pmk-1* or *atf-7* for complete downregulation.

350 **Supplemental Figure 2: Differential PA14-induced gene expression in *pmk-1* and *atf-***  
351 **7 mutant animals.**

352 2x2 comparison of genes differentially expressed by exposure to PA14 in N2 animals (x-  
353 axis) or upon loss of *pmk-1* (A) or *atf-7* (B) (y-axis). Transcripts highlighted in purple  
354 correspond to genes that were significantly different compared to OP50 in both genotypes  
355 (adjusted p-value of <0.05). Blue dots indicate genes that are significantly different in the  
356 N2 PA14/OP50 comparison only. Red dots represent genes that reach significance in  
357 only the mutant condition. Grey dots indicate genes with detected transcripts in at least  
358 one condition being compared, but that failed to reach significance cutoffs in either data  
359 set.

360 **Supplemental Figure 3: Evaluation of ATF-7::GFP peaks.**

361 **(A)** Motif analysis of ATF-7::GFP ChIP peaks. The top 400 peaks were considered for  
362 motif analysis. **(B)** Metagene analysis of ATF-7::GFP binding in all four ChIP conditions  
363 across all genes, genes that are two-fold upregulated, or two-fold downregulated by  
364 RNA-seq upon exposure to PA14 in a wild-type (N2) background. Shading represents  
365 standard error among replicates. **(C)** Ranked ATF-7::GFP peaks called in animals in all  
366 four ChIP conditions. Double red arrow indicates the peaks that were retained for further  
367 analysis. **(D,E)** Gene Set Enrichment Analysis (GSEA) of transcripts detected by RNA-  
368 seq (ranked from most upregulated to most downregulated upon PA14 exposure in N2  
369 animals) for association with ATF-7::GFP peaks in WT (C) or *pmk-1(km25)* mutant (D)  
370 animals exposed to OP50.

371 **Supplemental Figure 4: ATF-7 target genes that effect survival on *P. aeruginosa***

372 **PA14.**

373 Representative survival curves of animals treated with RNAi against indicated genes that  
374 resulted in a significant (p-value < 0.05 by log-rank test) reduction in survival on PA14  
375 compared to EV controls in 2/2 experiments. Animals were treated with RNAi for two  
376 generations prior to exposure to PA14. EV refers to HT115 carrying the Empty Vector  
377 control plasmid, L4440.



378 **Table S1: RNA-seq summary**

379 See separate electronic (.xlsx) file.

380

381 **Table S2: ATF-7::GFP peaks from ChIP-seq.**

382 See separate electronic (.xlsx) file.

383

384 **Table S3: Genes tested for Esp phenotype by RNAi knockdown.**

385 Protein domains classified using the David 6.8 Functional Annotation Tool. “Yes,”

386 indicates a significant ( $p$ -value  $< 0.05$  by log-rank test) reduction in survival on PA14

387 compared to Empty Vector control in 2/2 experiments.

## 388 References

- 389 1. Schulenburg H, Kurz CL, Ewbank JJ. Evolution of the innate immune system: the  
390 worm perspective. *Immunol Rev.* 2004;198: 36–58.
- 391 2. Richardson CE, Kooistra T, Kim DH. An essential role for XBP-1 in host  
392 protection against immune activation in *C. elegans*. *Nature.* Nature Publishing  
393 Group; 2010;463: 1092–1095. doi:10.1038/nature08762
- 394 3. Dunbar TL, Yan Z, Balla KM, Smelkinson MG, Troemel ER. *C. elegans* detects  
395 pathogen-induced translational inhibition to activate immune signaling. *Cell Host  
396 & Microbe.* 2012;11: 375–386. doi:10.1016/j.chom.2012.02.008
- 397 4. McEwan DL, Kirienko NV, Ausubel FM. Host translational inhibition by  
398 *Pseudomonas aeruginosa* Exotoxin A Triggers an immune response in  
399 *Caenorhabditis elegans*. *Cell Host & Microbe.* 2012;11: 364–374.  
400 doi:10.1016/j.chom.2012.02.007
- 401 5. Pellegrino MW, Nargund AM, Kirienko NV, Gillis R, Fiorese CJ, Haynes CM.  
402 Mitochondrial UPR-regulated innate immunity provides resistance to pathogen  
403 infection. *Nature.* 2014;516: 414–417. doi:10.1038/nature13818
- 404 6. Kim DH, Feinbaum R, Alloing G, Emerson FE, Garsin DA, Inoue H, et al. A  
405 conserved p38 MAP kinase pathway in *Caenorhabditis elegans* innate immunity.  
406 *Science.* American Association for the Advancement of Science; 2002;297: 623–  
407 626. doi:10.1126/science.1073759
- 408 7. Shivers RP, Pagano DJ, Kooistra T, Richardson CE, Reddy KC, Whitney JK, et al.  
409 Phosphorylation of the conserved transcription factor ATF-7 by PMK-1 p38  
410 MAPK regulates innate immunity in *Caenorhabditis elegans*. Ashrafi K, editor.  
411 *PLoS Genet.* 2010;6: e1000892. doi:10.1371/journal.pgen.1000892
- 412 8. Mallo GV, Kurz CL, Couillault C, Pujol N, Granjeaud S, Kohara Y, et al.  
413 Inducible Antibacterial Defense System in *C. elegans*. *Current Biology.* 2002;12:  
414 1209–1214. doi:10.1016/S0960-9822(02)00928-4
- 415 9. Huffman DL, Abrami L, Sasik R, Corbeil J, van der Goot FG, Aroian RV.  
416 Mitogen-activated protein kinase pathways defend against bacterial pore-forming  
417 toxins. *Proceedings of the National Academy of Sciences.* 2004;101: 10995–  
418 11000. doi:10.1073/pnas.0404073101
- 419 10. O'Rourke D, Baban D, Demidova M, Mott R, Hodgkin J. Genomic clusters,  
420 putative pathogen recognition molecules, and antimicrobial genes are induced by  
421 infection of *C. elegans* with *M. nematophilum*. *Genome Res.* 2006;16: 1005–1016.  
422 doi:10.1101/gr.50823006
- 423 11. Shapira M, Hamlin BJ, Rong J, Chen K, Ronen M, Tan M-W. A conserved role  
424 for a GATA transcription factor in regulating epithelial innate immune responses.

- 425 Proceedings of the National Academy of Sciences. 2006;103: 14086–14091.  
426 doi:10.1073/pnas.0603424103
- 427 12. Troemel ER, Chu SW, Reinke V, Lee SS, Ausubel FM, Kim DH. p38 MAPK  
428 Regulates Expression of Immune Response Genes and Contributes to Longevity in  
429 *C. elegans*. PLoS Genet. 2006;2: e183. doi:10.1371/journal.pgen.0020183
- 430 13. Wong D, Bazopoulou D, Pujol N, Tavernarakis N, Ewbank JJ. Genome-wide  
431 investigation reveals pathogen-specific and shared signatures in the response of  
432 *Caenorhabditis elegans* to infection. Genome Biology. 2007;8: R194.  
433 doi:10.1186/gb-2007-8-9-r194
- 434 14. Engelmann I, Griffon A, Tichit L, Montañana-Sanchis F, Wang G, Reinke V, et al.  
435 A comprehensive analysis of gene expression changes provoked by bacterial and  
436 fungal infection in *C. elegans*. Lehner B, editor. PLoS ONE. 2011;6: e19055.  
437 doi:10.1371/journal.pone.0019055
- 438 15. Shivers RP, Youngman MJ, Kim DH. Transcriptional responses to pathogens in  
439 *Caenorhabditis elegans*. Curr Opin Microbiol. 2008;11: 251–256.  
440 doi:10.1016/j.mib.2008.05.014
- 441 16. Inoue H, Hisamoto N, An JH, Oliveira RP, Nishida E, Blackwell TK, et al. The *C.*  
442 *elegans* p38 MAPK pathway regulates nuclear localization of the transcription  
443 factor SKN-1 in oxidative stress response. Genes & Development. 2005;19: 2278–  
444 2283. doi:10.1101/gad.1324805
- 445 17. Chikka MR, Anbalagan C, Dvorak K, Dombeck K, Prahlad V. The Mitochondria-  
446 Regulated Immune Pathway Activated in the *C. elegans* Intestine Is  
447 Neuroprotective. Cell Reports. 2016;16: 2399–2414.  
448 doi:10.1016/j.celrep.2016.07.077
- 449 18. Brenner S. The genetics of *Caenorhabditis elegans*. Genetics. Genetics Society of  
450 America; 1974;77: 71–94. doi:10.1073/pnas.0910342106
- 451 19. Arribere JA, Bell RT, Fu BXH, Artiles KL, Hartman PS, Fire AZ. Efficient  
452 marker-free recovery of custom genetic modifications with CRISPR/Cas9 in  
453 *Caenorhabditis elegans*. Genetics. 2014;198: 837–846.  
454 doi:10.1534/genetics.114.169730
- 455 20. Tillman EJ, Richardson CE, Cattie DJ, Reddy KC, Lehrbach NJ, Droste R, et al.  
456 Endoplasmic Reticulum Homeostasis Is Modulated by the Forkhead Transcription  
457 Factor FKH-9 During Infection of *Caenorhabditis elegans*. Genetics. 2018;:  
458 genetics.301450.2018. doi:10.1534/genetics.118.301450
- 459 21. Killing of *Caenorhabditis elegans* by *Pseudomonas aeruginosa* used to model  
460 mammalian bacterial pathogenesis. Proceedings of the National Academy of  
461 Sciences. 1999;96: 715–720.

- 462 22. Meisel JD, Panda O, Mahanti P, Schroeder FC, Kim DH. Chemosensation of  
463 Bacterial Secondary Metabolites Modulates Neuroendocrine Signaling and  
464 Behavior of *C. elegans*. *Cell*. 2014;159: 267–280. doi:10.1016/j.cell.2014.09.011
- 465 23. Ercan S, Giresi PG, Whittle CM, Zhang X, Green RD, Lieb JD. X chromosome  
466 repression by localization of the *C. elegans* dosage compensation machinery to  
467 sites of transcription initiation. *Nat Genet*. 2007;39: 403–408. doi:10.1038/ng1983
- 468 24. Gerstein MB, Lu ZJ, Van Nostrand EL, Cheng C, Arshinoff BI, Liu T, et al.  
469 Integrative analysis of the *Caenorhabditis elegans* genome by the modENCODE  
470 project. *Science*. American Association for the Advancement of Science;  
471 2010;330: 1775–1787. doi:10.1126/science.1196914
- 472 25. Li H. Fast and accurate short read alignment with Burrows-Wheeler transform.  
473 *Bioinformatics*. 2009;25: 1754–1760. doi:10.1093/bioinformatics/btp324
- 474 26. Li H, Handsaker B, Wysoker A, Fennell T, Ruan J, Homer N, et al. The Sequence  
475 Alignment/Map format and SAMtools. *Bioinformatics*. 2009;25: 2078–2079.  
476 doi:10.1093/bioinformatics/btp352
- 477 27. Quinlan AR, Hall IM. BEDTools: a flexible suite of utilities for comparing  
478 genomic features. *Bioinformatics*. 2010;26: 841–842.  
479 doi:10.1093/bioinformatics/btq033
- 480 28. Machanick P, Bailey TL. MEME-CHIP: motif analysis of large DNA datasets.  
481 *Bioinformatics*. 2011;27: 1696–1697. doi:10.1093/bioinformatics/btr189
- 482 29. Bailey TL, Gribskov M. Combining evidence using p-values: application to  
483 sequence homology searches. *Bioinformatics*. 1998;14: 48–54.
- 484 30. Dobin A, Davis CA, Schlesinger F, Drenkow J, Zaleski C, Jha S, et al. STAR:  
485 ultrafast universal RNA-seq aligner. *Bioinformatics*. 2013;29: 15–21.  
486 doi:10.1093/bioinformatics/bts635
- 487 31. Li B, Dewey CN. RSEM: accurate transcript quantification from RNA-Seq data  
488 with or without a reference genome. *BMC Bioinformatics*. 2011;12: 323.  
489 doi:10.1186/1471-2105-12-323
- 490 32. Love MI, Huber W, Anders S. Moderated estimation of fold change and dispersion  
491 for RNA-seq data with DESeq2. *Genome Biology*. BioMed Central Ltd; 2014;15:  
492 550. doi:10.1186/s13059-014-0550-8
- 493 33. Benjamini Y, Hochberg Y. Controlling the false discovery rate: a practical and  
494 powerful approach to multiple testing. *Journal of the Royal Statistical Society,*  
495 *Series B*. 1995;57: 289–300.

- 496 34. Edgar R, Domrachev M, Lash AE. Gene Expression Omnibus: NCBI gene  
497 expression and hybridization array data repository. *Nucleic Acids Res. Oxford*  
498 *University Press*; 2002;30: 207–210.
- 499 35. Shen L, Shao N, Liu X, Nestler E. ngs.plot: Quick mining and visualization of  
500 next-generation sequencing data by integrating genomic databases. *BMC*  
501 *Genomics*. 2014;15: 284. doi:10.1186/1471-2164-15-284
- 502 36. Subramanian A, Tamayo P, Mootha VK, Mukherjee S, Ebert BL, Gillette MA, et  
503 al. Gene set enrichment analysis: a knowledge-based approach for interpreting  
504 genome-wide expression profiles. *Proc Natl Acad Sci USA*. 2005;102: 15545–  
505 15550. doi:10.1073/pnas.0506580102
- 506 37. Kamath RS, Fraser AG, Dong Y, Poulin G, Durbin R, Gotta M, et al. Systematic  
507 functional analysis of the *Caenorhabditis elegans* genome using RNAi. *Nature*.  
508 2003;421: 231–237. doi:10.1038/nature01278
- 509 38. Rual J-F, Ceron J, Koreth J, Hao T, Nicot A-S, Hirozane-Kishikawa T, et al.  
510 Toward improving *Caenorhabditis elegans* phenome mapping with an ORFeome-  
511 based RNAi library. *Genome Res*. 2004;14: 2162–2168. doi:10.1101/gr.2505604

# Figure 1

**A**

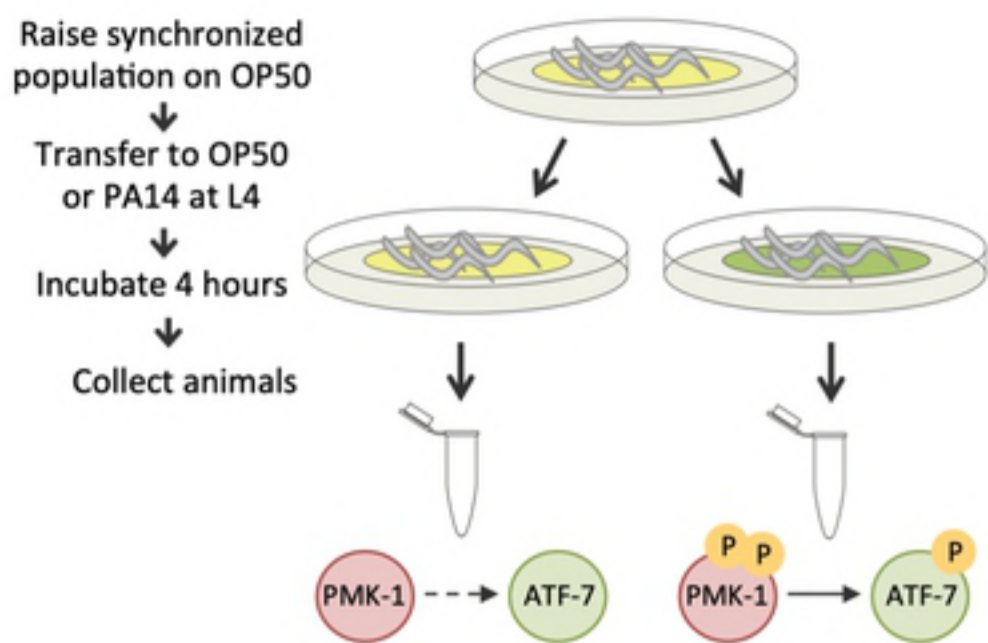

**B**

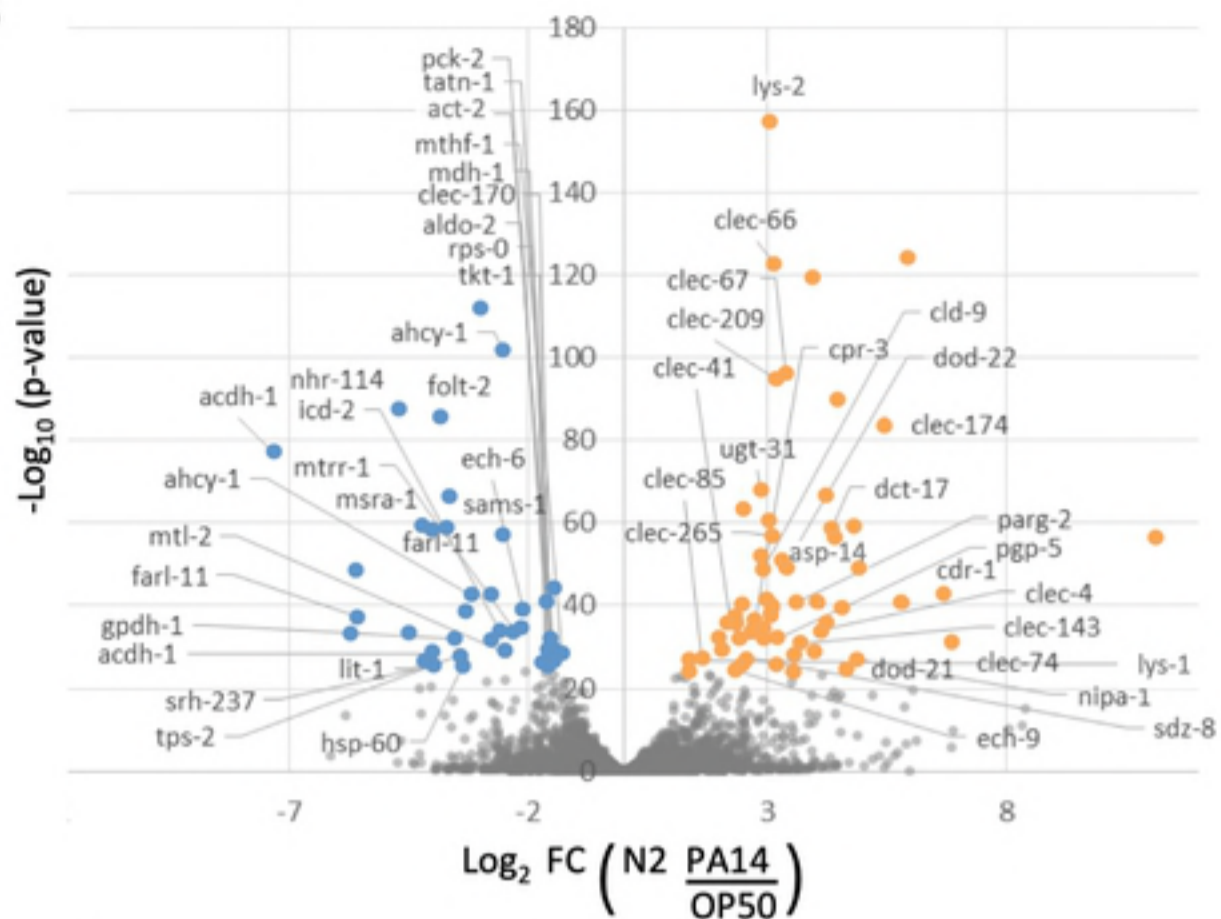

**C**

bioRxiv preprint doi: <https://doi.org/10.1101/469817>; this version posted November 13, 2018. The copyright holder for this preprint (which was not certified by peer review) is the author/funder, who has granted bioRxiv a license to display the preprint in perpetuity. It is made available under aCC-BY 4.0 International license.

| GO term, InterPRO classification                        | Fold Enrichment | p-value  | FDR      |
|---------------------------------------------------------|-----------------|----------|----------|
| GO:0045087~ innate immune response                      | 7.24            | 3.57E-61 | 5.03E-58 |
| IPR003366: CUB-like domain                              | 13.97           | 1.91E-28 | 2.74E-25 |
| GO:0050829~ defense response to Gram-negative bacterium | 7.55            | 2.00E-15 | 2.81E-12 |
| IPR005071: Transmembrane glycoprotein                   | 11.27           | 4.35E-10 | 6.24E-07 |
| IPR001304: C-type lectin                                | 3.60            | 2.05E-07 | 2.94E-04 |
| IPR002035: von Willebrand factor, type A                | 6.84            | 4.03E-07 | 5.77E-04 |

**D**

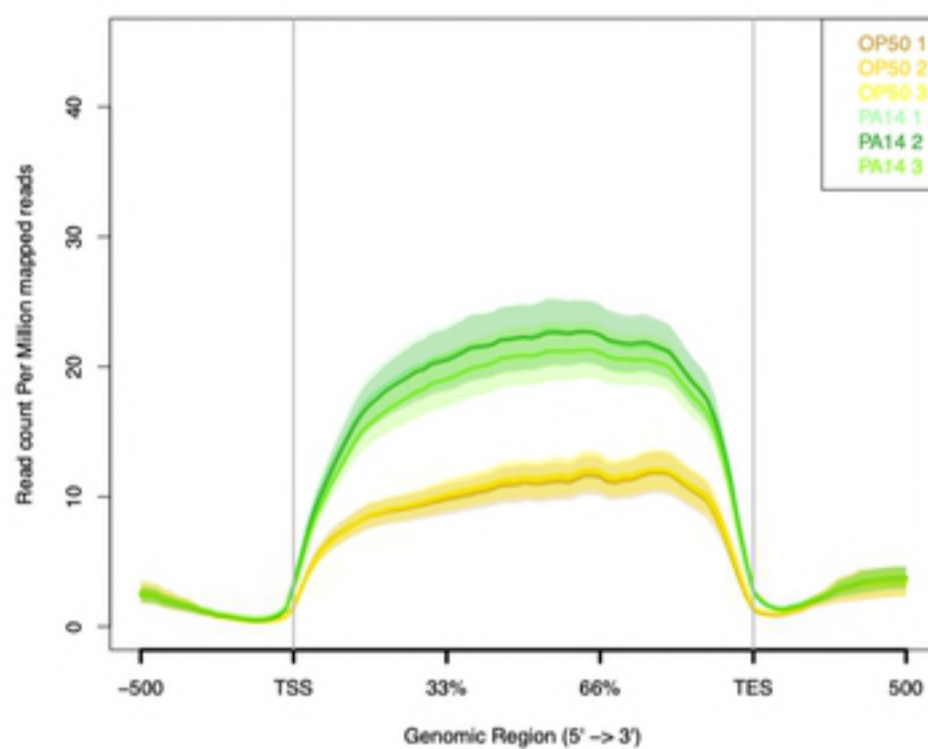

**E**

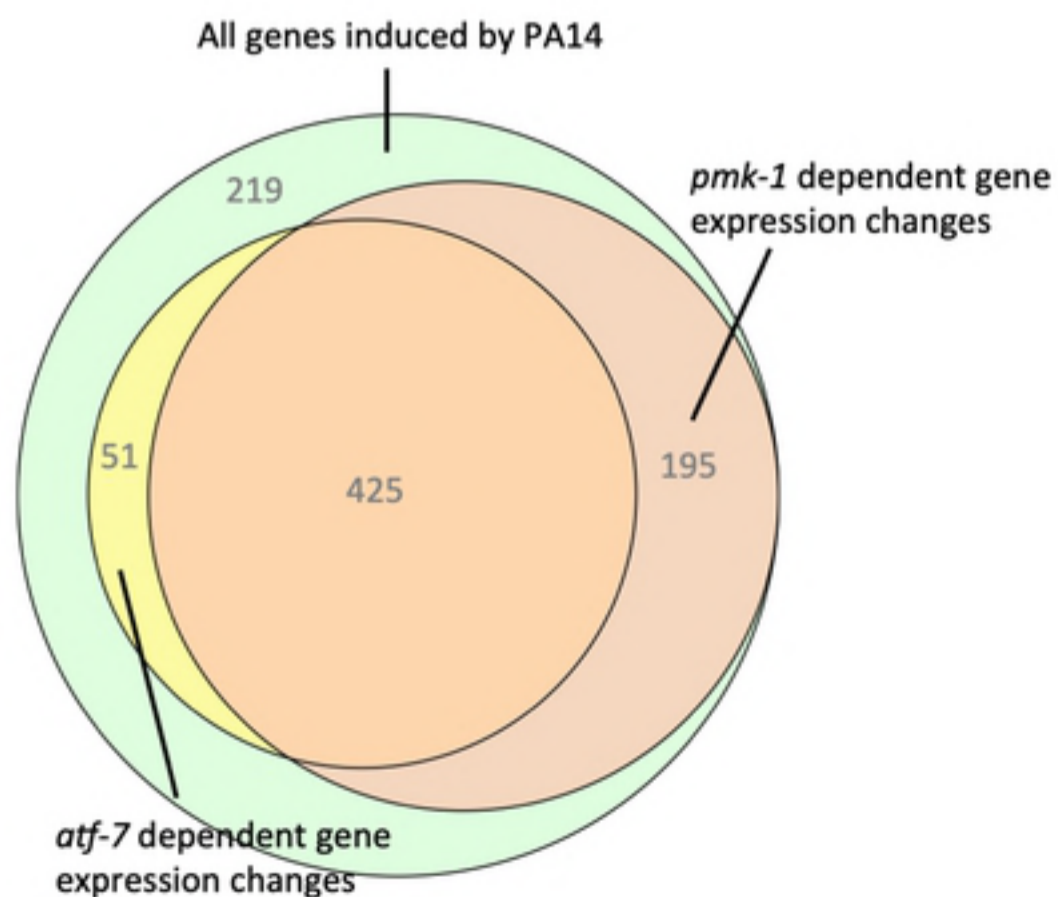

Figure 2

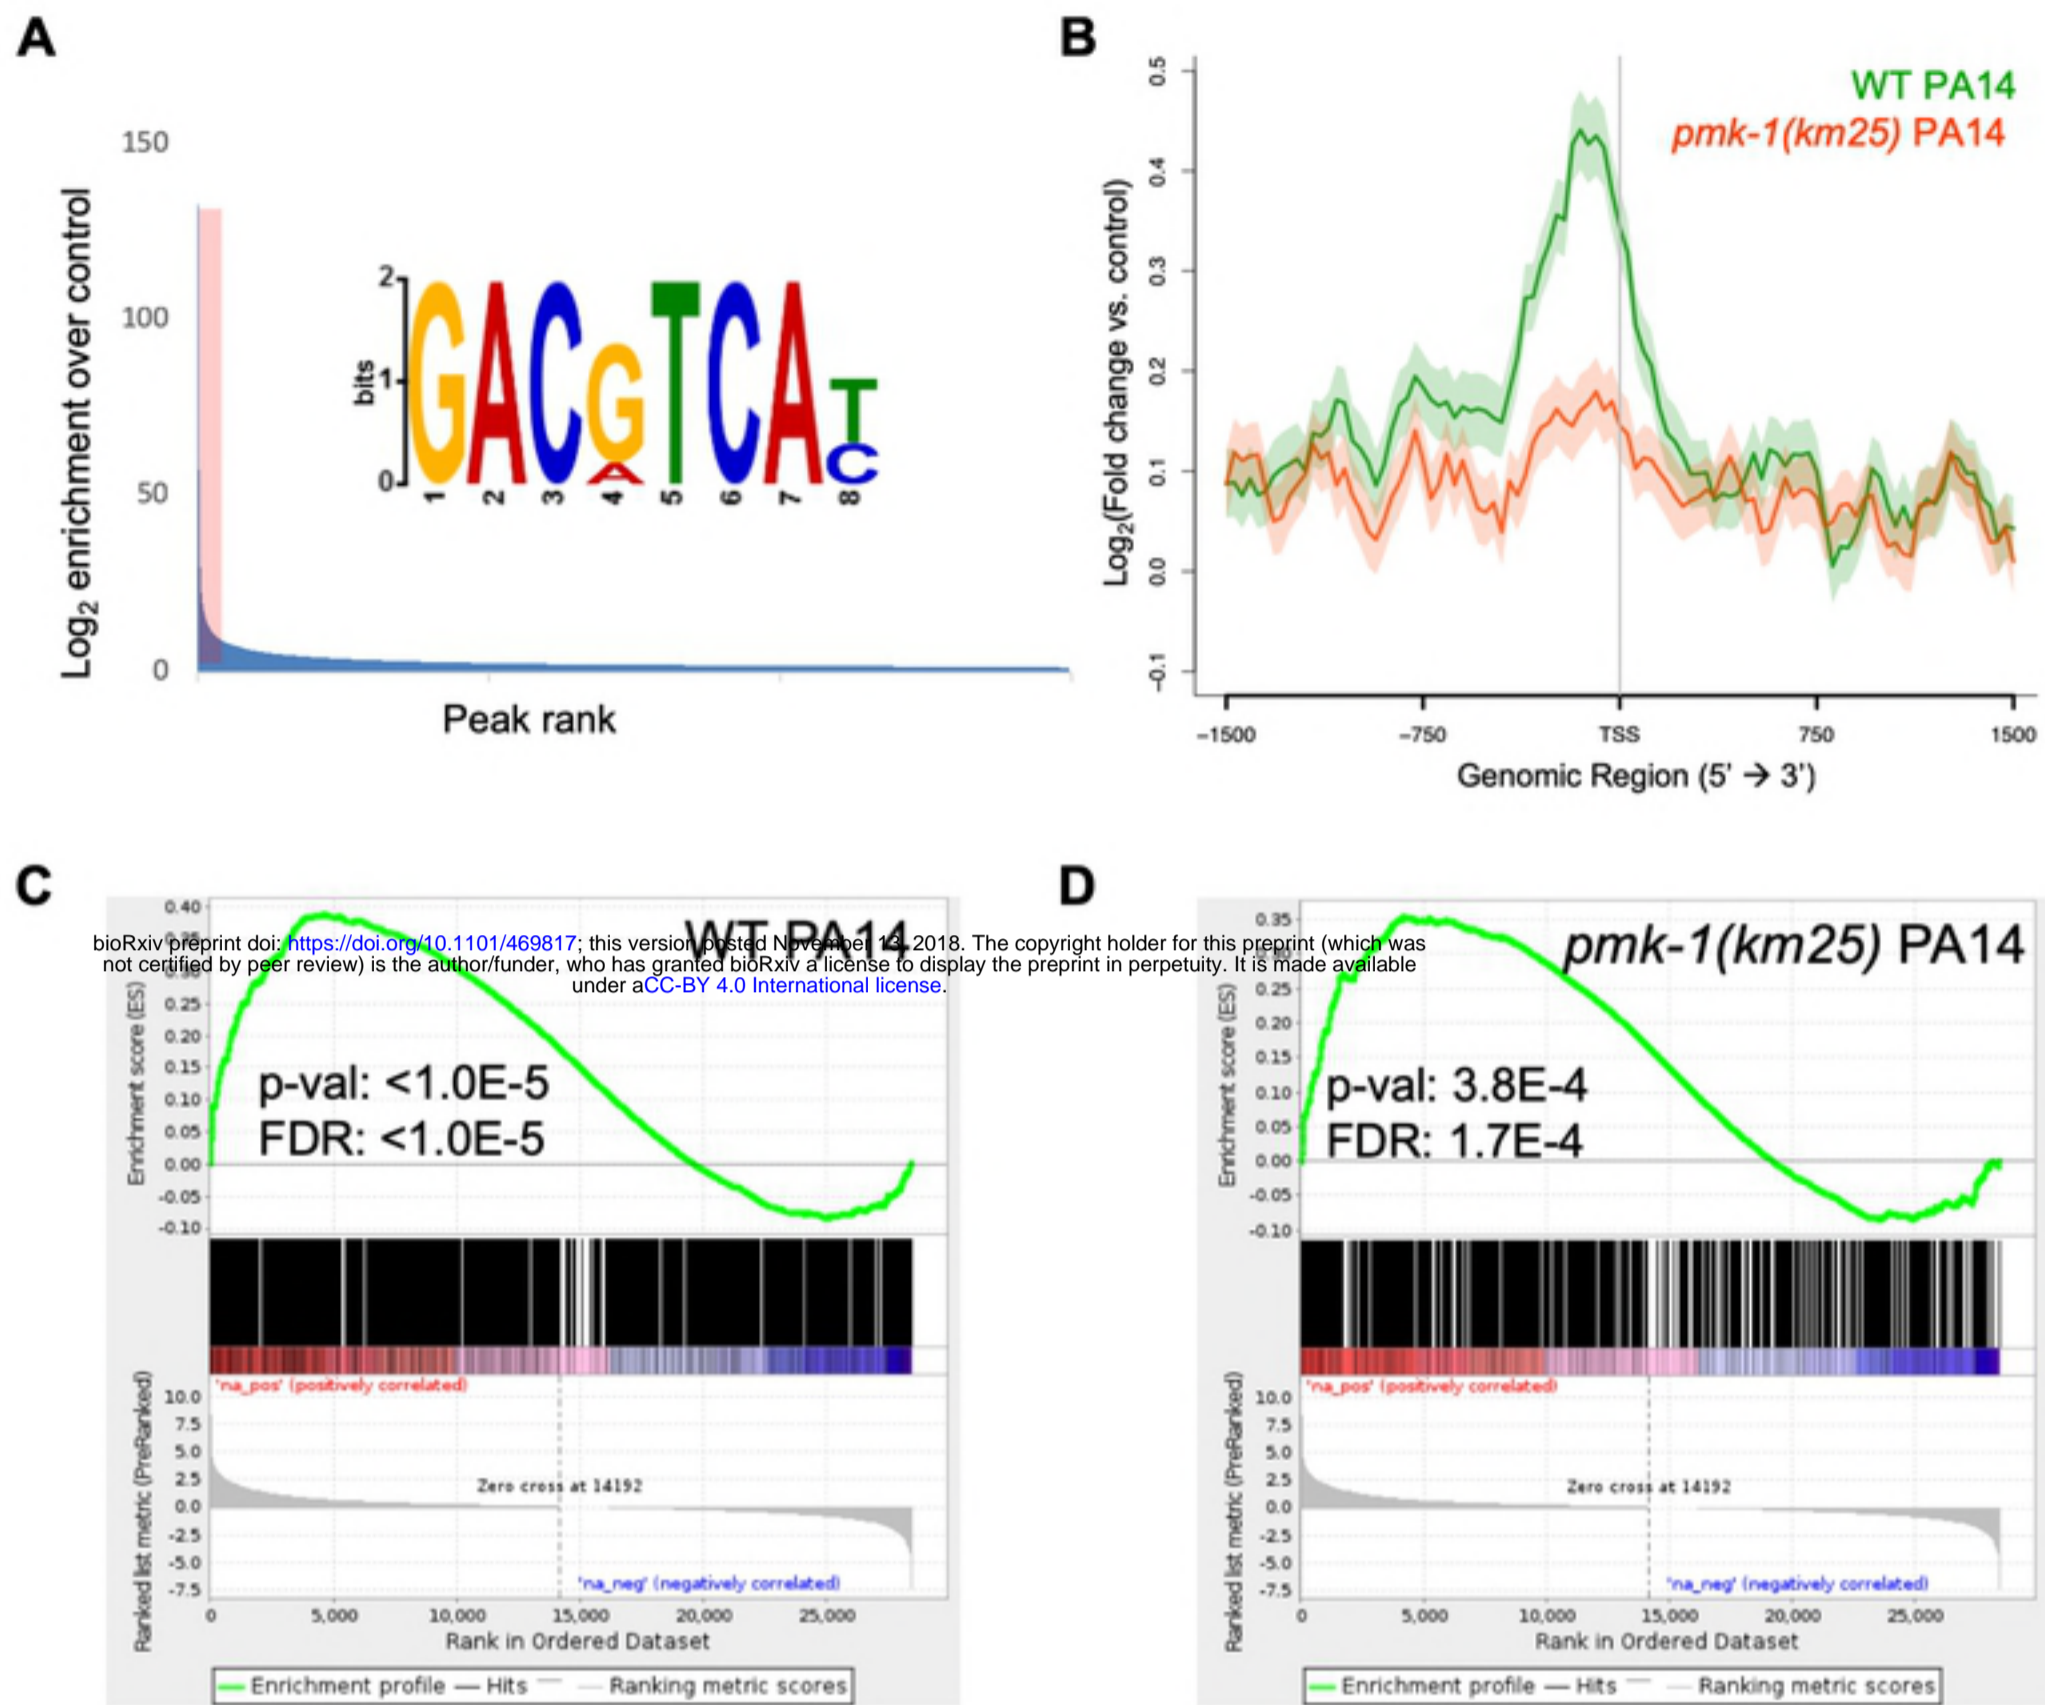

Figure 2

# Figure 3

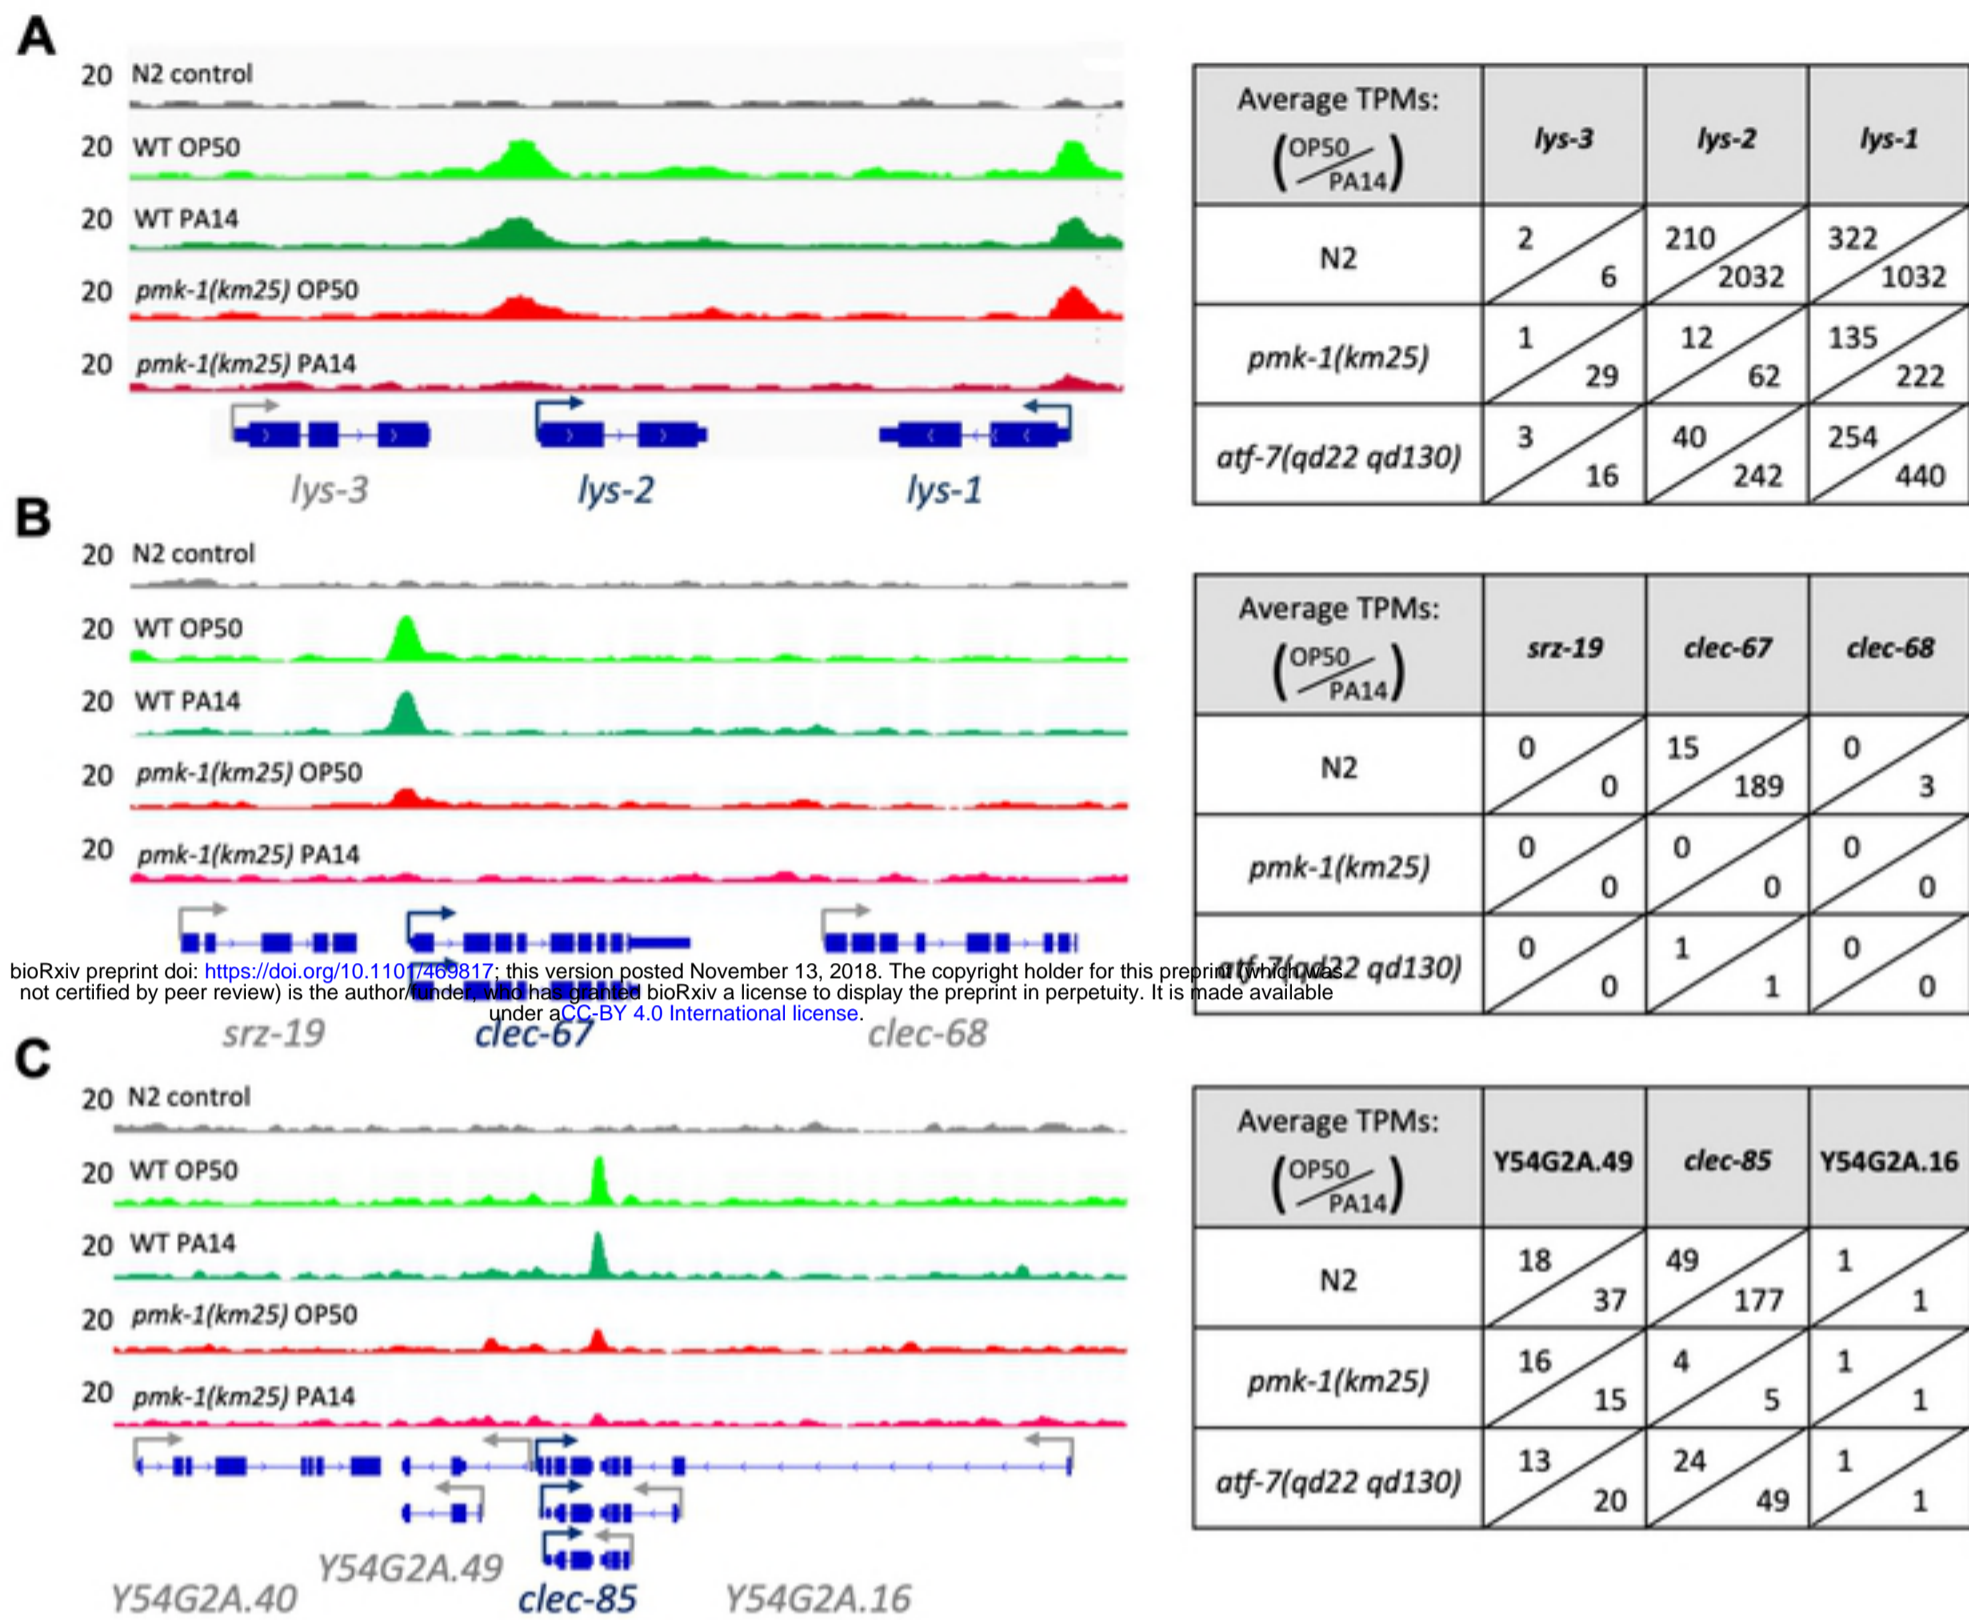



**Figure 4**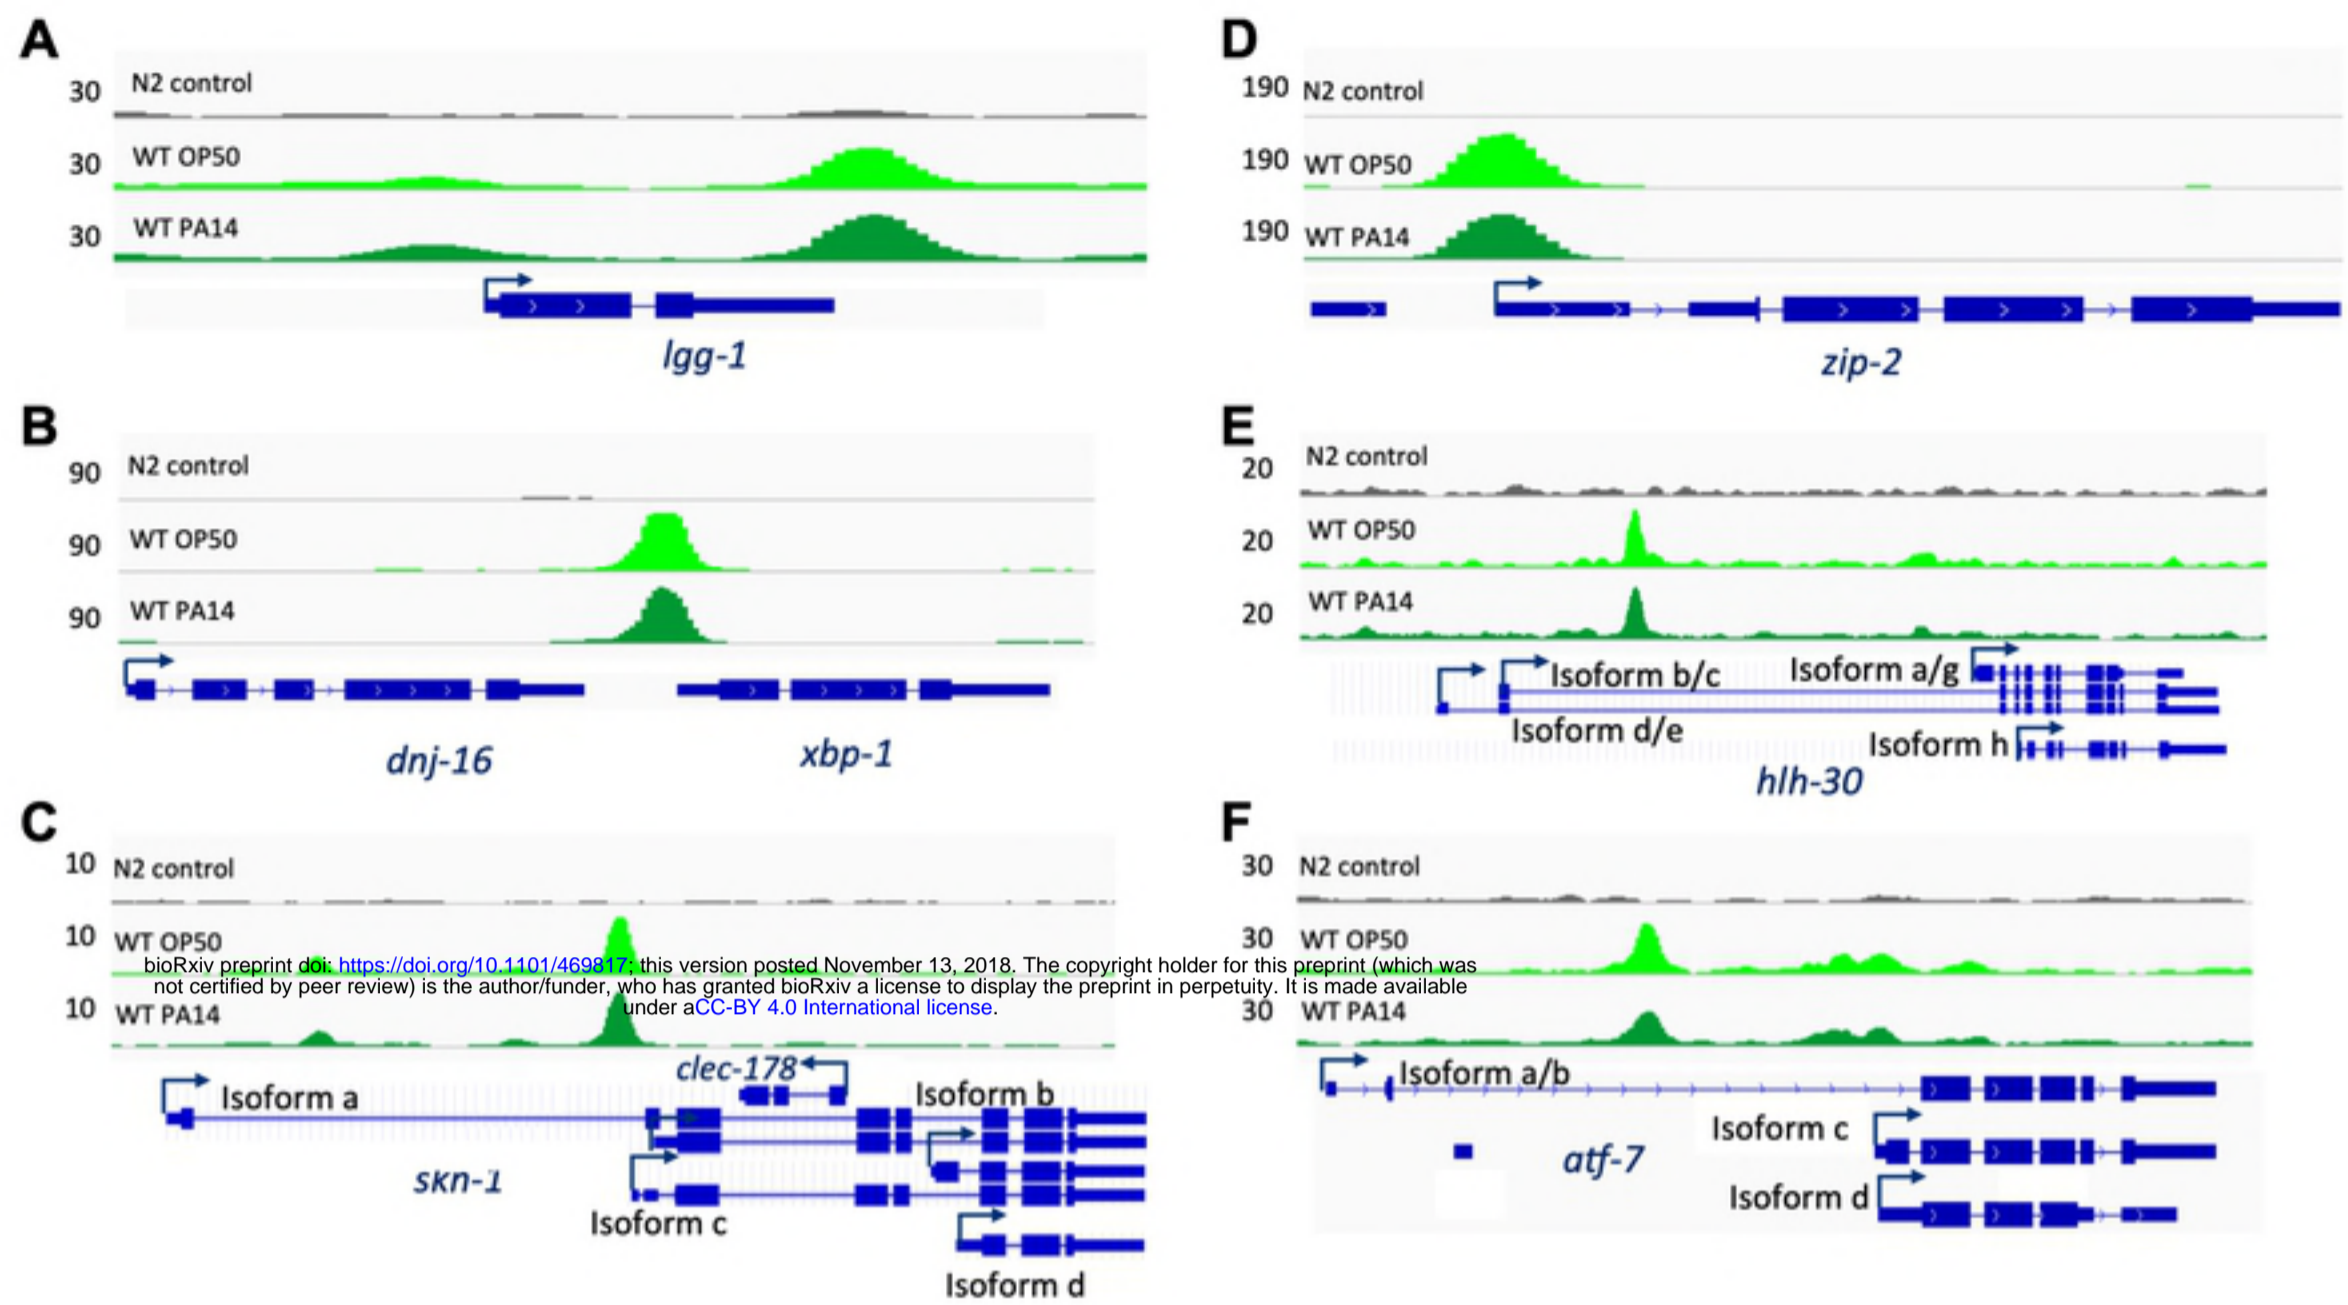**Figure 4**

# Supplemental Figure 1

**A**

| GO term, InterPRO classification                               | Fold Enrichment | p-value  | FDR      |
|----------------------------------------------------------------|-----------------|----------|----------|
| GO:0000003~ reproduction                                       | 1.90            | 4.14E-17 | 6.13E-14 |
| GO:0006412~ translation                                        | 4.34            | 2.11E-16 | 3.33E-13 |
| GO:0002119~ nematode larval development                        | 1.89            | 5.90E-15 | 8.72E-12 |
| GO:0009792~ embryo development ending in birth or egg hatching | 1.59            | 5.47E-12 | 8.11E-09 |
| GO:0008340~ determination of adult lifespan                    | 2.04            | 1.35E-09 | 2.00E-06 |
| GO:0055114~ oxidation-reduction process                        | 2.51            | 1.40E-08 | 2.08E-05 |
| GO:0006915~ apoptotic process                                  | 2.49            | 8.73E-08 | 1.29E-04 |
| GO:0006095~ glycolytic process                                 | 2.51            | 1.40E-08 | 2.08E-05 |

**B**

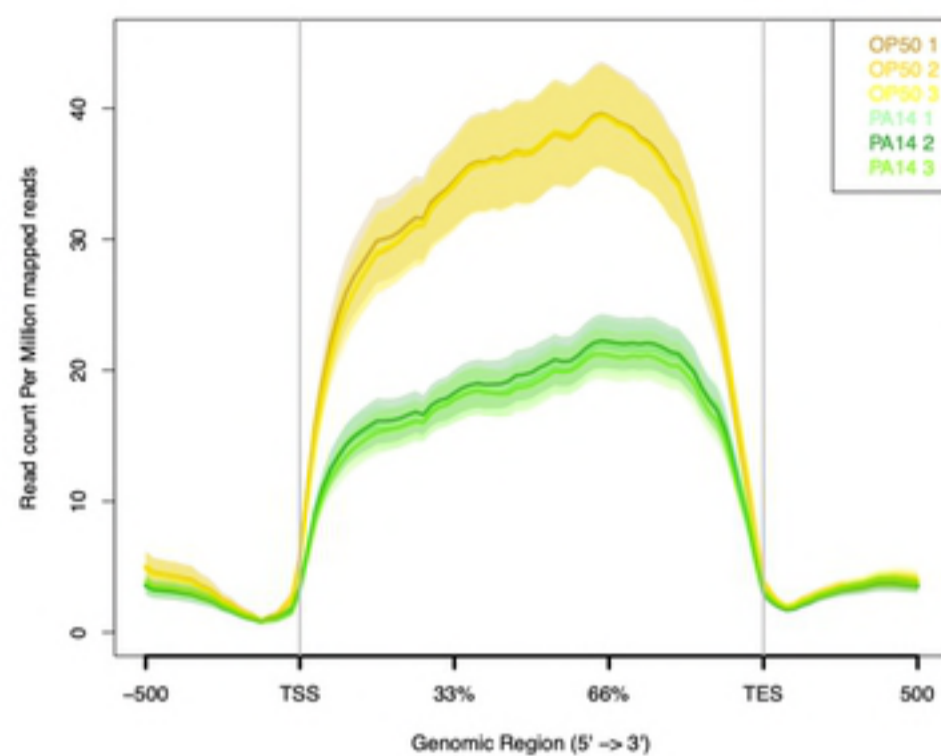

bioRxiv preprint doi: <https://doi.org/10.1101/469817>; this version posted November 13, 2018. The copyright holder for this preprint (which was not certified by peer review) is the author/funder, who has granted bioRxiv a license to display the preprint in perpetuity. It is made available under aCC-BY 4.0 International license.

**C**

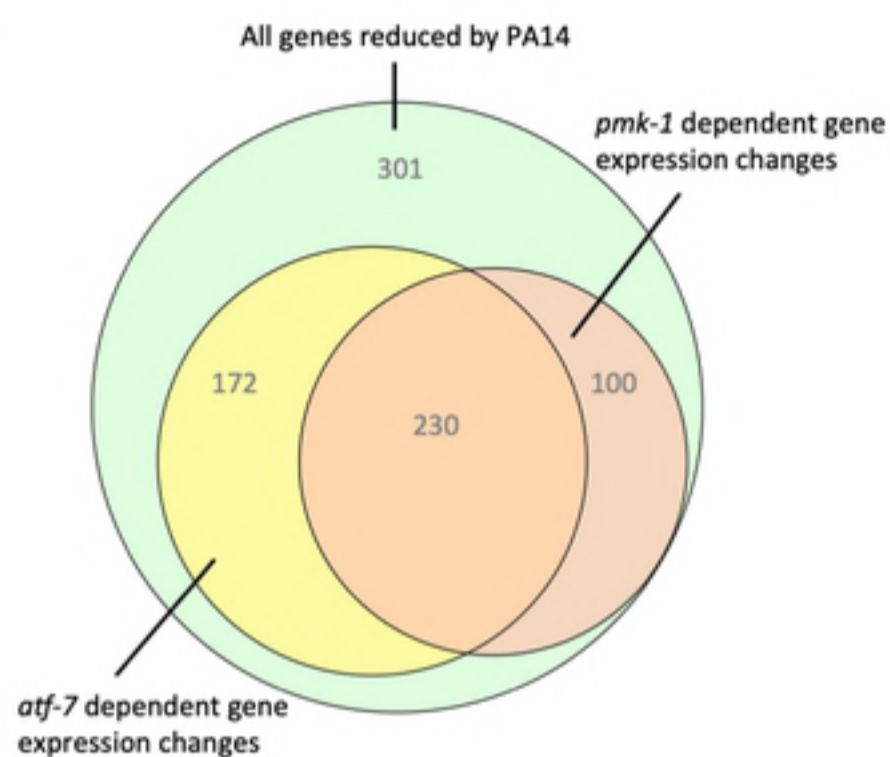

# Supplemental Figure 2

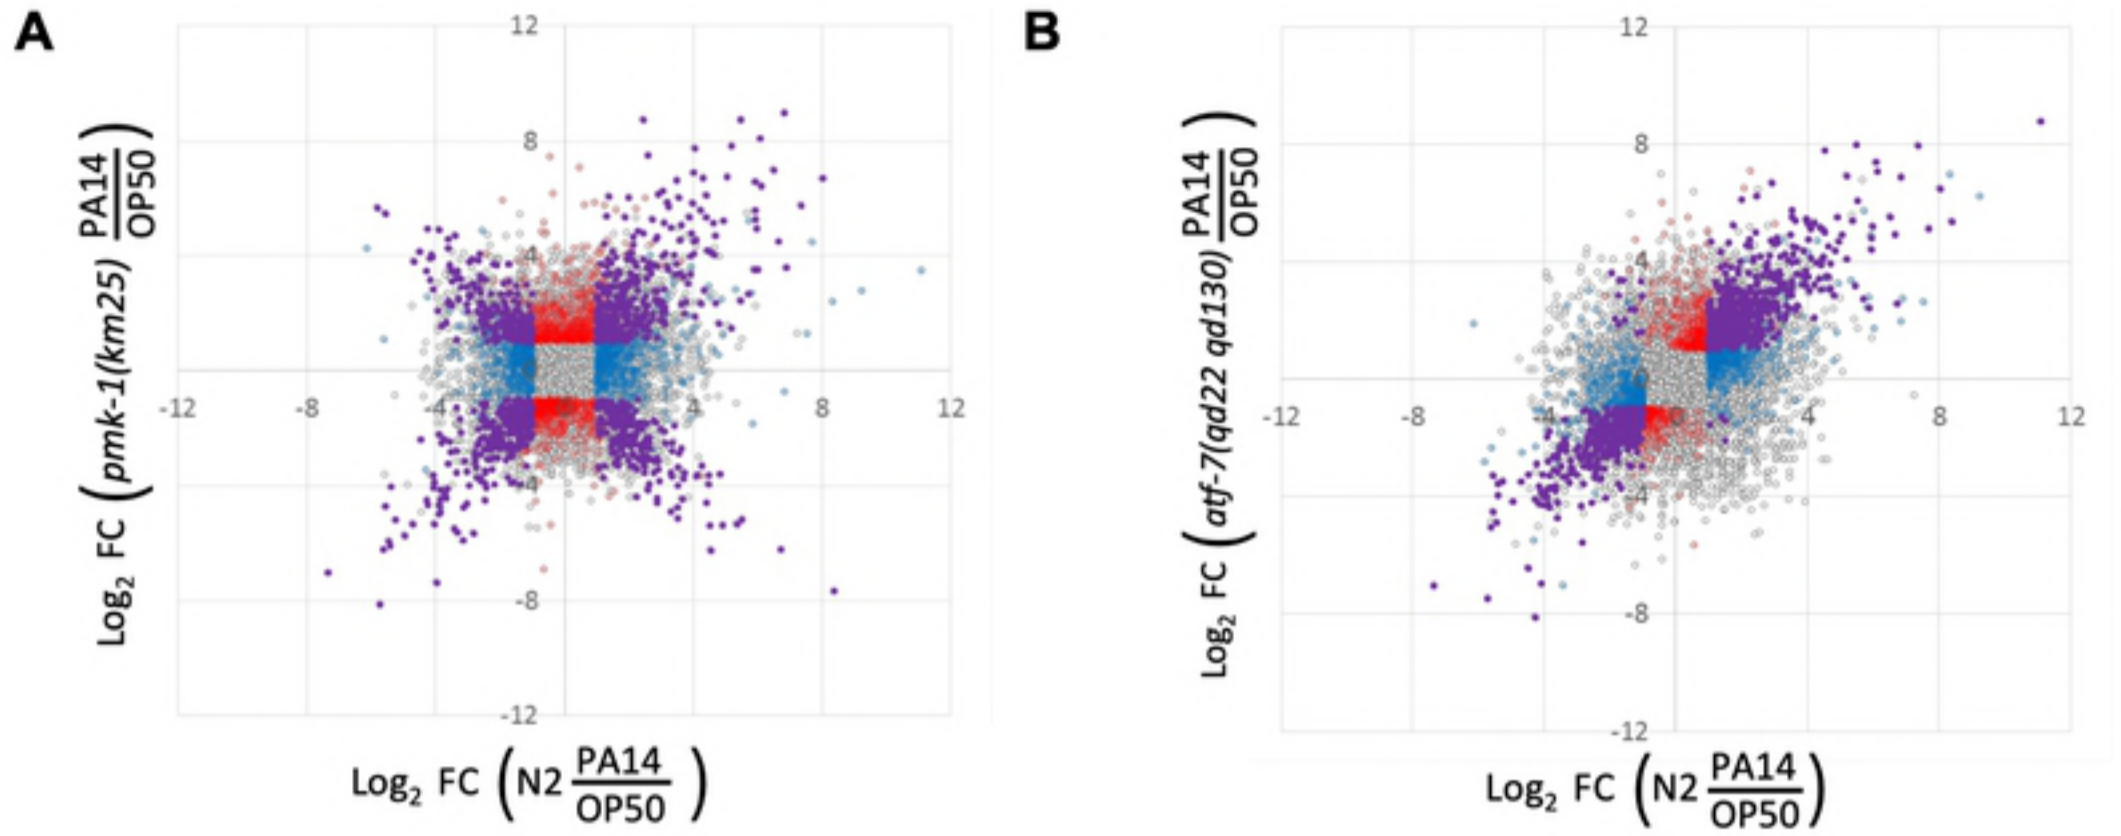

bioRxiv preprint doi: <https://doi.org/10.1101/469817>; this version posted November 13, 2018. The copyright holder for this preprint (which was not certified by peer review) is the author/funder, who has granted bioRxiv a license to display the preprint in perpetuity. It is made available under aCC-BY 4.0 International license.

**A**

| Details   |           |          |          |                  |
|-----------|-----------|----------|----------|------------------|
| Positives | Negatives | P-value  | E-value  | Unersaed E-value |
| 322 / 399 | 3 / 399   | 1.1e-142 | 2.8e-138 | 2.8e-138         |

  

| Enriched Matching Words |           |           |          |          |
|-------------------------|-----------|-----------|----------|----------|
| Word                    | Positives | Negatives | P-value  | E-value  |
| GACGTCAT                | 233 / 399 | 0 / 399   | 3.0e-092 | 7.7e-088 |
| GACGTCAC                | 177 / 399 | 1 / 399   | 5.5e-063 | 1.4e-058 |
| GACATCAT                | 39 / 399  | 1 / 399   | 1.5e-011 | 3.8e-007 |
| GACATCAC                | 15 / 399  | 1 / 399   | 2.3e-004 | 5.9e+000 |

**B**

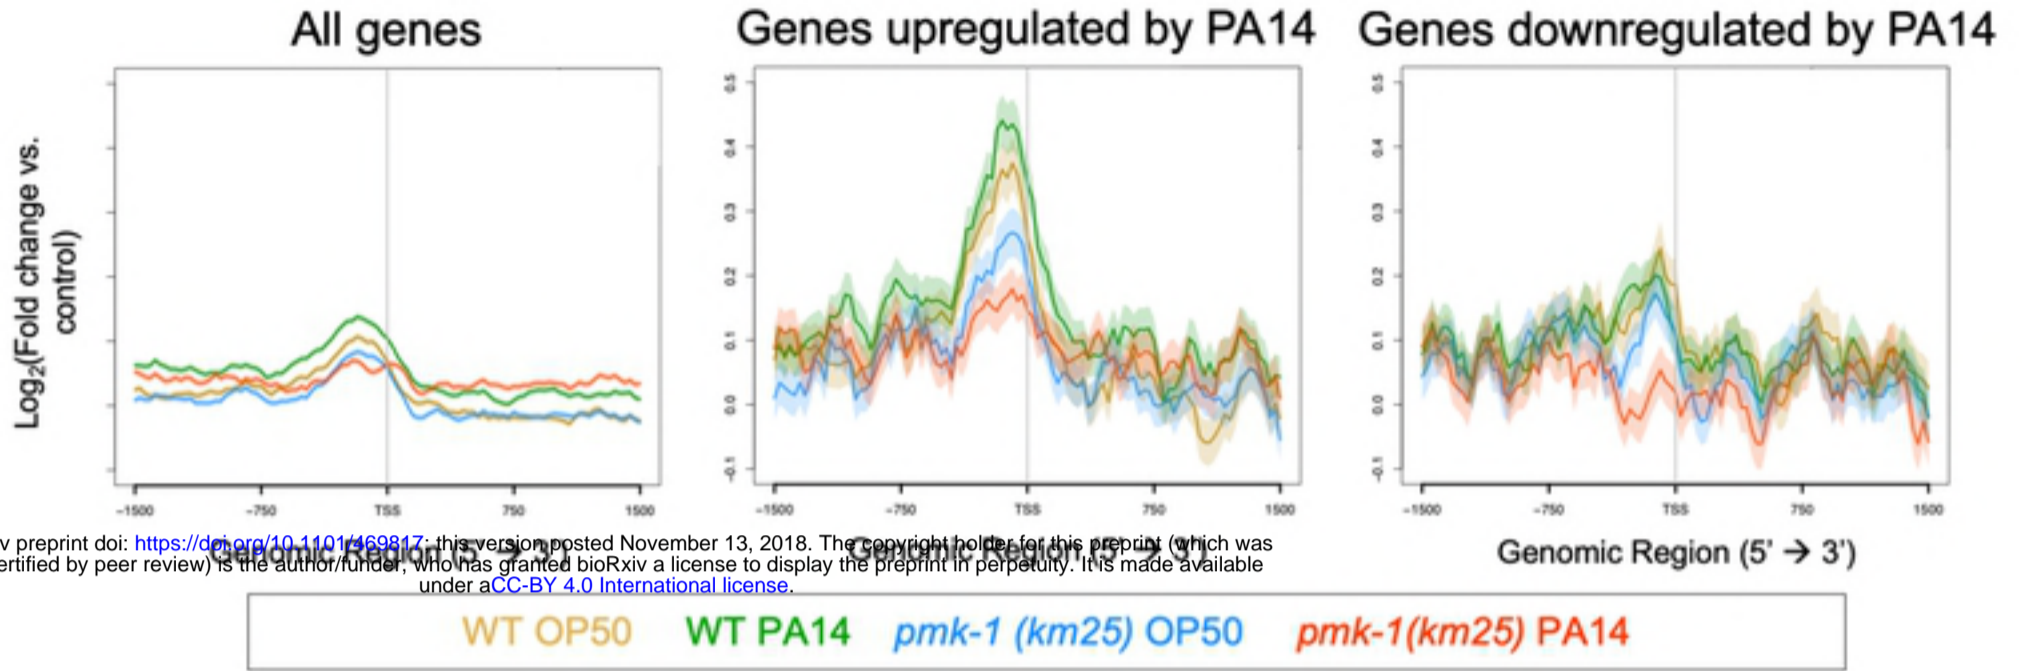

**C**

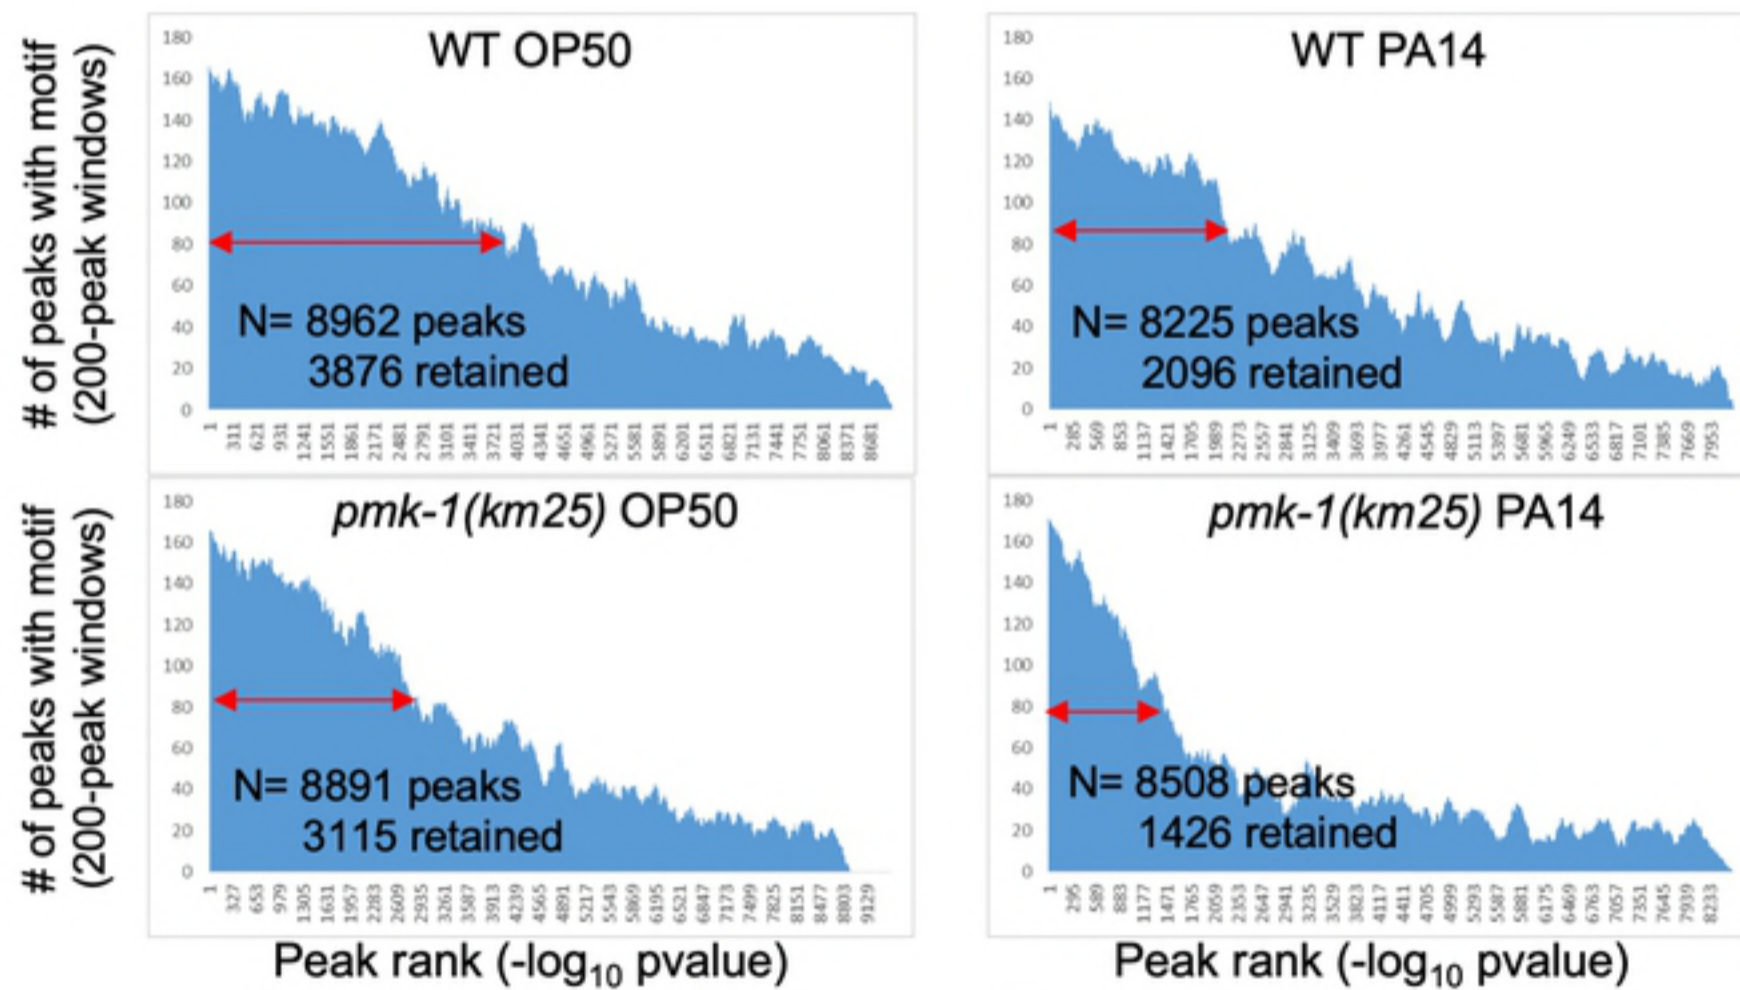

**D**

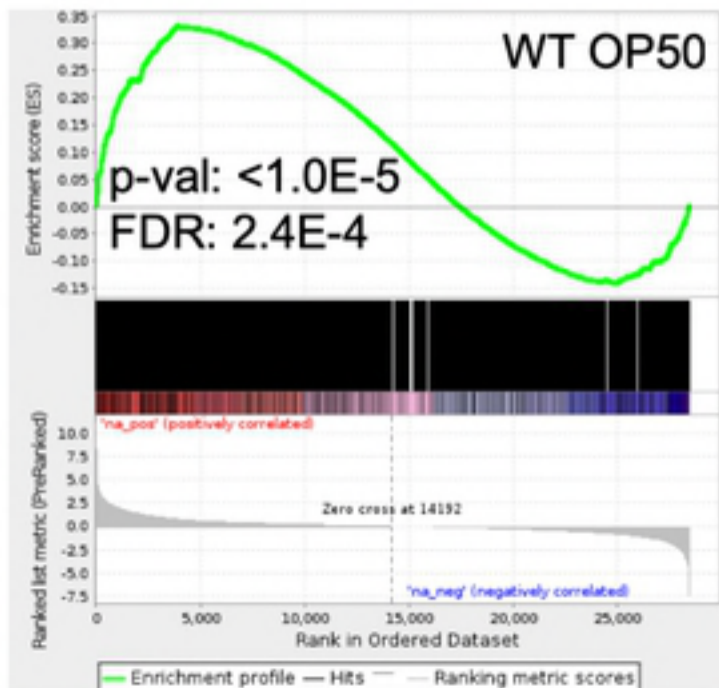

**E**

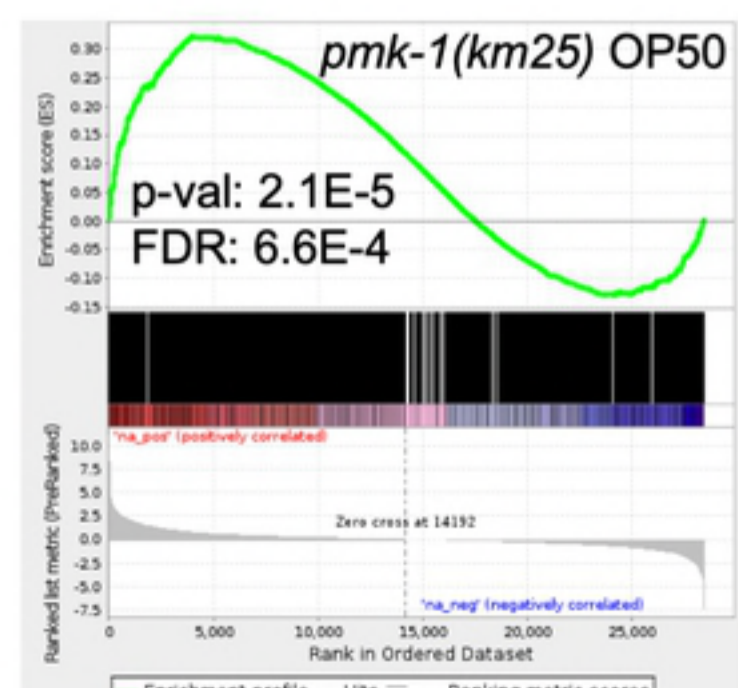

# Supplemental Figure 4

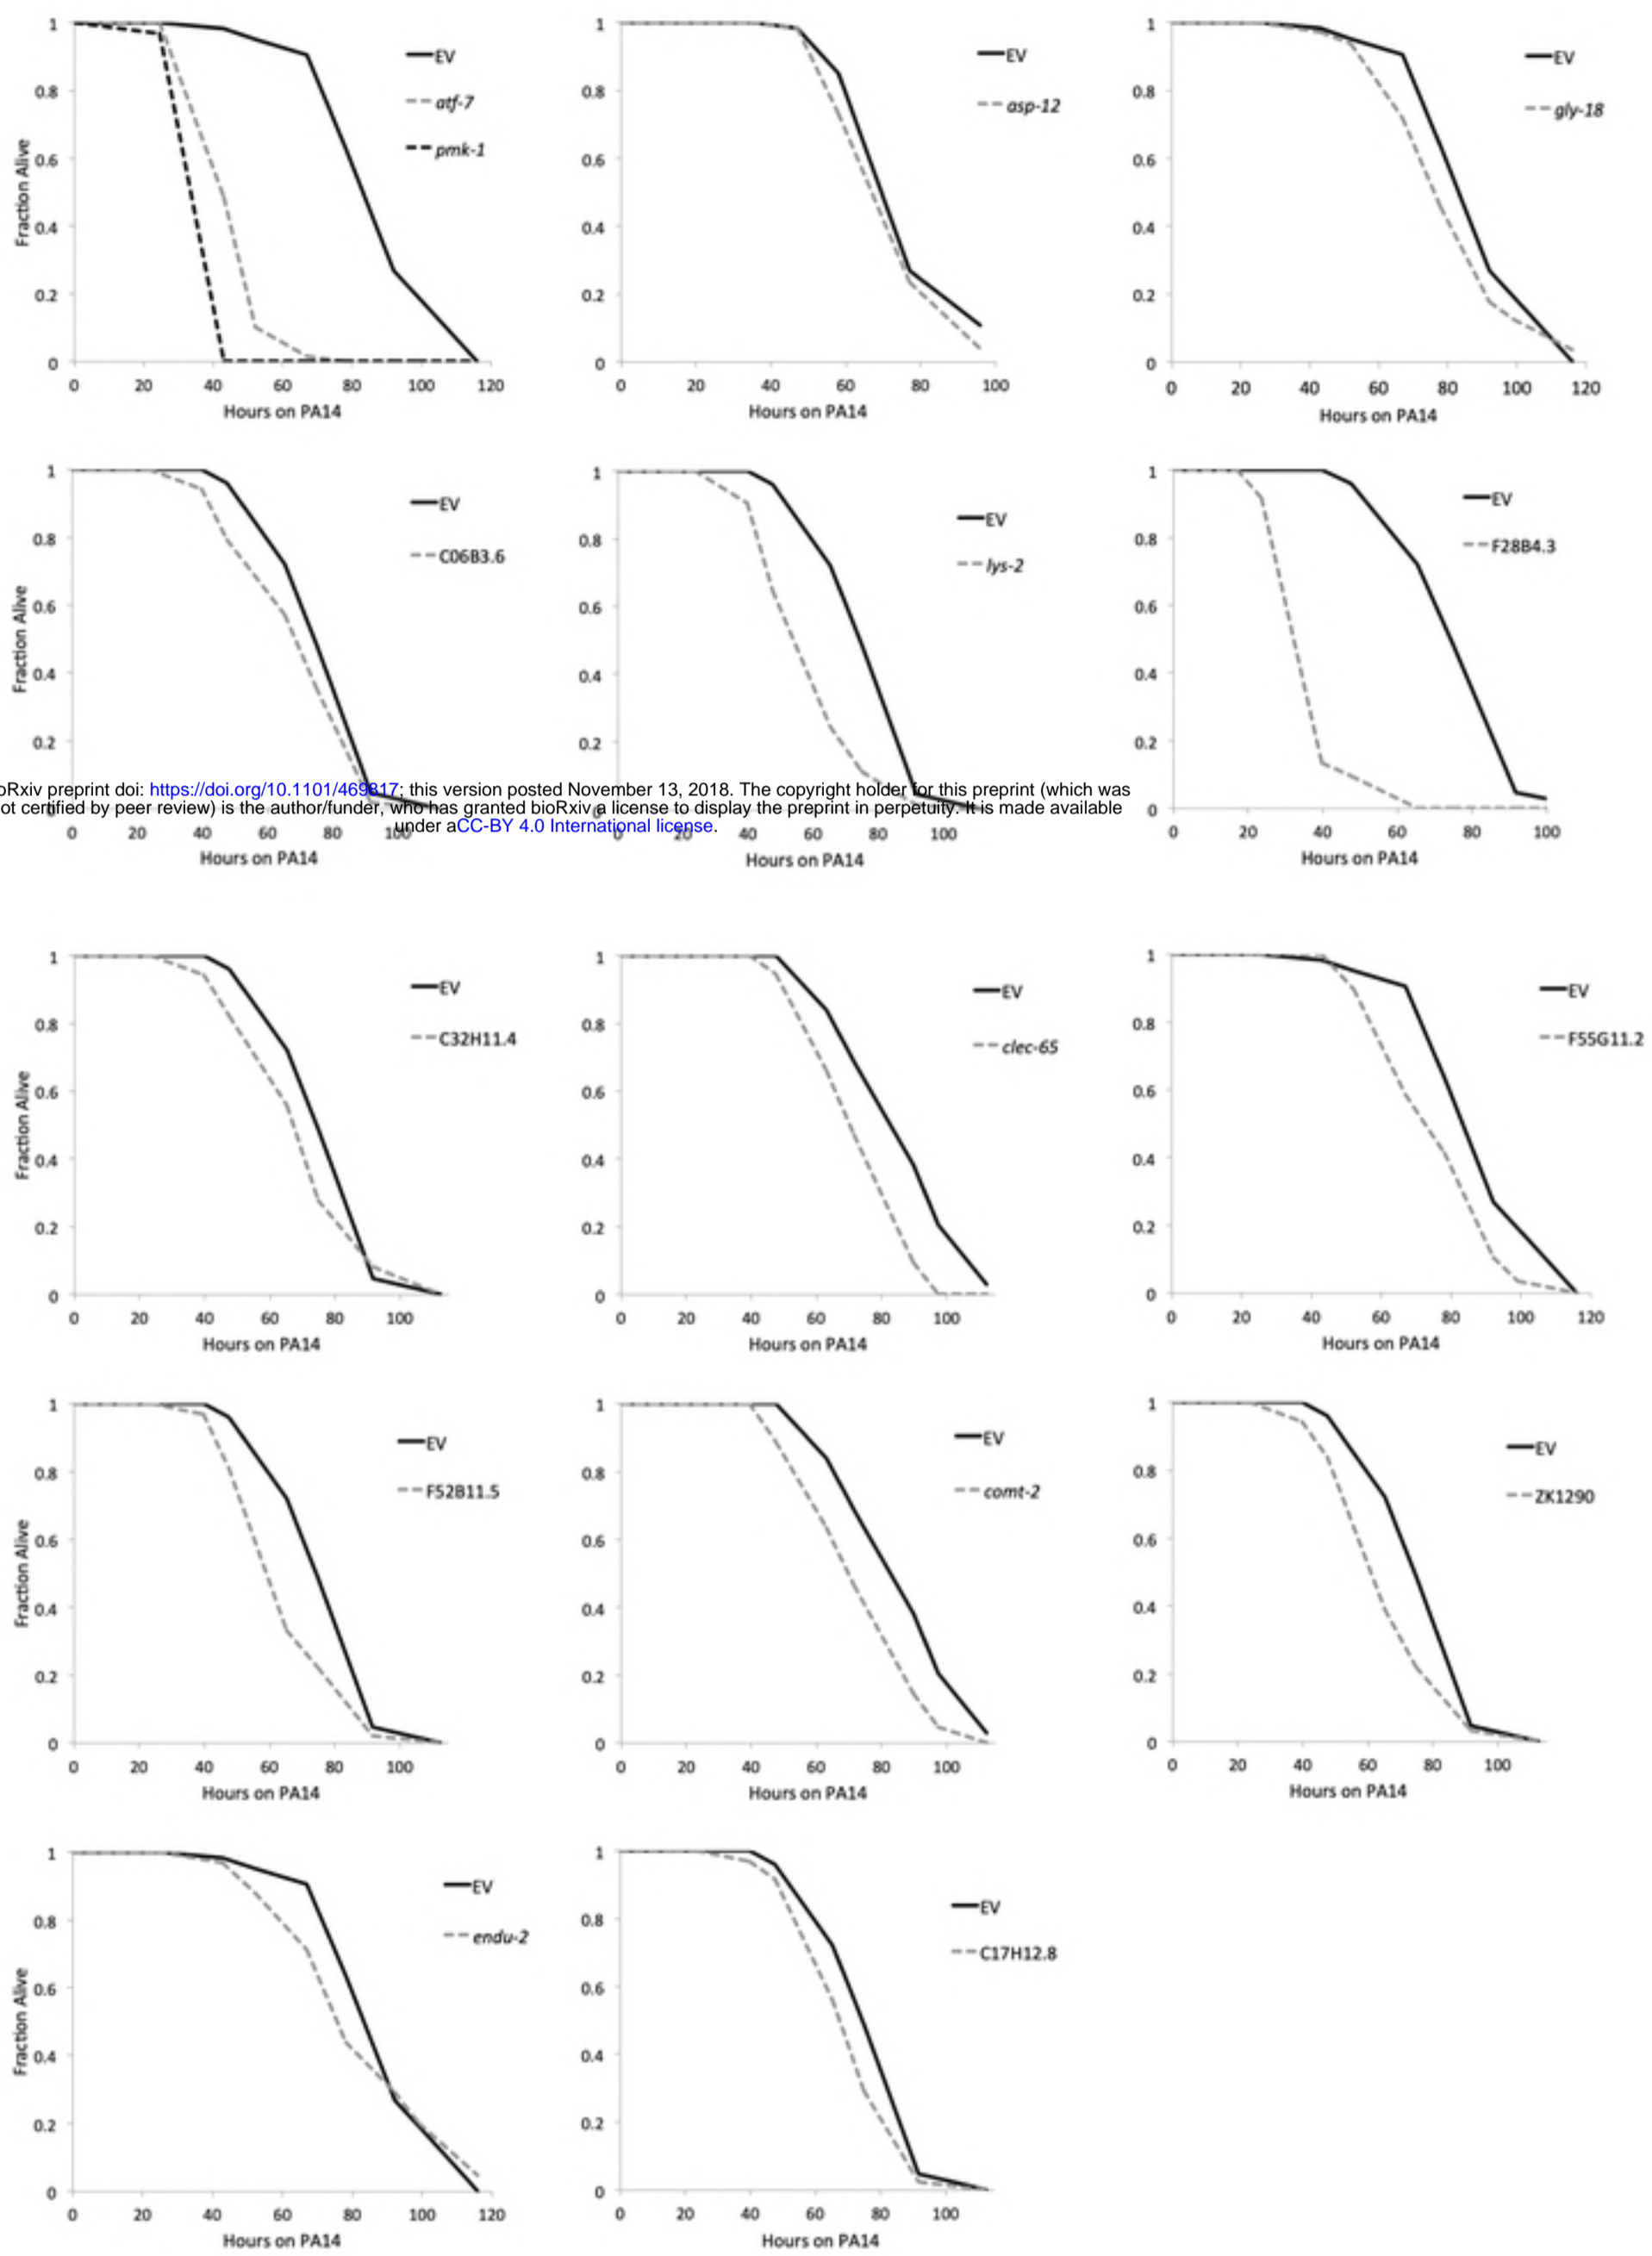

Figure S4
